# Supplementary material for: Synthesis of α-amino nitriles through one-pot selective Ru-photocatalyzed oxidative cyanation of amines
Source: Royal Society of Chemistry journal article supplement (doi:10.1039/d0qi00580k), 2020-01-01
Supplement: d0qi00580k1.pdf [file d0qi00580k1.pdf]

# Supporting Information

## Synthesis of $\alpha$ -amino nitriles through one-pot selective Ru-photocatalyzed oxidative cyanation of amines

Igor Echevarría,<sup>a</sup> Mónica Vaquero,<sup>a</sup> Roberto Quesada<sup>a</sup> and Gustavo Espino\*<sup>a</sup>

<sup>a</sup>Departamento de Química, Facultad de Ciencias, Universidad de Burgos, Plaza Misael Bañuelos s/n, 09001, Burgos, Spain.

### Table of Contents

|                                                                                                                   |    |
|-------------------------------------------------------------------------------------------------------------------|----|
| 1.- General Information                                                                                           | 2  |
| 2.- Synthesis and characterization of the Ru(II)-complexes                                                        | 3  |
| 3.- X-Ray diffraction: Crystallographic parameters and spatial interactions                                       | 8  |
| 4.- Photostability of the Ruthenium complexes in CD <sub>3</sub> CN                                               | 10 |
| 5.- Theoretical Calculations                                                                                      | 14 |
| 6.- Determination of <sup>1</sup> O <sub>2</sub> generation quantum yields.                                       | 17 |
| 7.- Electrochemical measurements and individual CV of the Ru(II) complexes.                                       | 19 |
| 8.- Procedure for the photocatalytic oxidation of amines                                                          | 21 |
| 9.- General One-pot procedure of photocatalytic oxidative cyanation of amines                                     | 22 |
| 10.- Screening of different cyanide reagents with [Ru <sub>3</sub> ]Cl <sub>2</sub> as PC                         | 22 |
| 11.- <sup>1</sup> H NMR spectra and characterization of the crude and isolated $\alpha$ -amino nitriles           | 23 |
| 12.- Detection of by-products in photocatalytic experiments                                                       | 30 |
| 13. 10-fold scale-up                                                                                              | 31 |
| 14. Photooxidative coupling of <b>1a</b> to produce <b>2a</b> using [Ru <sub>3</sub> ]Cl <sub>2</sub> (0.1 mol %) | 32 |

## 1.- General Information

All synthetic manipulations were carried out under an atmosphere of dry, oxygen-free nitrogen using standard Schlenk techniques. The solvents were dried and distilled under nitrogen atmosphere before use. Elemental analyses were performed with a Thermo Fisher Scientific EA Flash 2000 Elemental Microanalyzer. The disagreement between calculated and found values for carbon of complexes **[Ru1]Cl<sub>2</sub>**-**[Ru5]Cl<sub>2</sub>** was slightly > 0.4%, so that fraction of solvent molecules (H<sub>2</sub>O) were introduced in the molecular formulae to improve agreement. IR spectra were recorded on a Jasco FT/IR-4200 spectrophotometer (4000–400 cm<sup>-1</sup> range) with Single Reflection ATR Measuring Attachment. UV-Vis absorption was measured in an Evolution 300 UV-Vis double beam spectrophotometer (Thermo Scientific). Fluorescence steady-state and lifetime measurements were performed in a FLS980 (Edinburg Instruments) Fluorimeter with Xenon Arc Lamp 450W and TCSPC laser, respectively. Quantum Yield was determined by using in a FLS980 (Edinburg Instruments) with Xenon Arc Lamp 450W and Red PMT Sphere as detector. HR-ESI(+) Mass spectra (position of the peaks in Da) were recorded with an Agilent LC-MS system (1260 Infinity LC / 6545 Q-TOF MS spectrometer) using DCM/DMSO (4:1) as the sample solvent and (0.1%) aqueous HCOOH/MeOH as the mobile phase. The experimental *m/z* values are expressed in Da compared with the *m/z* values for monoisotopic fragments. NMR samples were prepared by dissolving the suitable amount of compound in 0.5 mL of the respective deuterated solvent and the spectra were recorded at 298 K on a Varian Unity Inova-400 (399.94 MHz for <sup>1</sup>H; 376.29 MHz for <sup>19</sup>F; 100.6 MHz for <sup>13</sup>C). Typically, <sup>1</sup>H NMR spectra were acquired with 32 scans into 32 k data points over a spectral width of 16 ppm. <sup>1</sup>H and <sup>13</sup>C{<sup>1</sup>H} chemical shifts were internally referenced to TMS via the residual <sup>1</sup>H and <sup>13</sup>C signals of DMSO-d<sub>6</sub> (δ = 2.50 ppm and δ = 39.52 ppm), CD<sub>3</sub>CN (δ = 1.94 ppm and δ = 118.69 (-CN) and 1.39 (-CD<sub>3</sub>) ppm) and CDCl<sub>3</sub> (δ = 7.26 ppm and δ = 77.16 ppm), according to the values reported by Fulmer et al.<sup>1</sup> Chemical shift values (δ) are reported in ppm and coupling constants (*J*) in Hertz. The splitting of proton resonances in the reported <sup>1</sup>H NMR data is defined as s = singlet, d = doublet, t = triplet, q = quartet, m = multiplet, bs = broad singlet. 2D NMR spectra such as <sup>1</sup>H-<sup>1</sup>H gCOSY, <sup>1</sup>H-<sup>1</sup>H NOESY, <sup>1</sup>H-<sup>13</sup>C gHSQC and <sup>1</sup>H-<sup>13</sup>C gHMBC were recorded using standard pulse sequences. The probe temperature (±1 K) was controlled by a standard unit calibrated with methanol as a reference. All NMR data processing was carried out using MestReNova version 10.0.2.

**Starting materials.** RuCl<sub>3</sub>·x H<sub>2</sub>O was purchased from Johnson Matthey and used as received. The starting dimer [Ru(bpy)<sub>2</sub>Cl<sub>2</sub>]·2H<sub>2</sub>O (bpy = 2,2'-bipyridine) was prepared according to the reported procedure.<sup>2</sup> The reagents 2,2'-bipyridine, iodomethane and benzyl bromide were purchased from Sigma-Aldrich; 2-(2-pyridyl)benzimidazole and 4-iodobenzyl bromide were purchased from Acros Organics-Fisher Scientific, and 2-(bromomethyl)naphthalene was purchased from Alfa Aesar. All of them were used without further purification. Deuterated solvents (DMSO-d<sub>6</sub>, CDCl<sub>3</sub>, CD<sub>3</sub>CN) were obtained from Eurisotop. Conventional solvents such as diethyl ether (Fisher Scientific), acetone (Fisher Scientific) and 2-ethoxyethanol (Across Organics) were degassed and in some cases distilled prior to use. Acetonitrile used in the photocatalytic experiments were acquired from a Fisher Scientific (HPLC quality). Tetrabutylammonium hexafluorophosphate ([<sup>n</sup>Bu<sub>4</sub>N][PF<sub>6</sub>]) was purchased from Acros. Synthetic procedure of the ligands was previously described in the literature: **L2**,<sup>3</sup> **L3**,<sup>4</sup> **L43** and **L5**.<sup>5</sup>

## 2.- Synthesis and characterization of the Ru(II)-complexes

<sup>1</sup> G. R. Fulmer, A. J. M. Miller, N. H. Sherden, H. E. Gottlieb, A. Nudelman, B. M. Stoltz, J. E. Bercaw, K. I. Goldberg, *Organometallics* **2010**, *29*, 2176–2179.

<sup>2</sup> G. Sprintschnik, H. W. Sprintschnik, P. P. Kirsch and D. G. Whitten, *J. Am. Chem. Soc.*, **1977**, *99*, 4947–4954

<sup>3</sup> J.A. Maynard, I.D. Rae, D. Rash, J.M. Swan, *Aust. J. Chem.*, **1971**, *24*, 1873-1881.

<sup>4</sup> W.-K. Huang, C.-W. Cheng, S.-M. Chang, Y.-P. Lee, E. W.-G. Diau, *Chem. Commun.* **2010**, *46*, 8992–8994.

<sup>5</sup> N. M. Shavaleev, Z. R. Bell, T. L. Easun, R. Rutkaite, M. D. Ward. *Dalton Trans.* **2004**, 3678–3688.

## Synthesis of $[\text{Ru}(\text{bpy})_2(\text{L1})]\text{Cl}_2$ : $[\text{Ru1}]\text{Cl}_2$

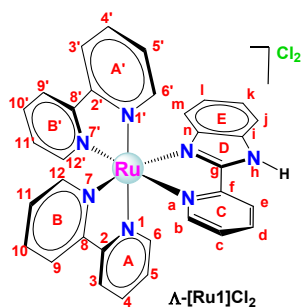

In a 100 mL Schlenk flask, the ancillary ligand **L1** (0.037 g, 0.193 mmol) was added to a solution of  $\text{RuCl}_2(\text{bpy})_2 \cdot 2\text{H}_2\text{O}$  (0.100 g, 0.193 mmol) in EtOH (19 mL), and the mixture was stirred at 90 °C for 16 h. Then, the volume was reduced to the half under vacuum and  $\text{Et}_2\text{O}$  (15 mL) was added to precipitate a dark red solid that was isolated by filtration and washed with  $\text{Et}_2\text{O}$  (5 mL). Then, the solid was dried under vacuum at 80 °C for 6 h. Dark red powder. Yield: 0.081 g (0.119 mmol, 62%).  $^1\text{H NMR}$  (400 MHz,  $\text{DMSO-d}_6$ , 25 °C)  $\delta$  16.20 (s, 1H;  $\text{H}^{\text{N-H}}$ ), 9.06 (d,  $J_{\text{H-H}} = 7.7$  Hz, 1H;  $\text{H}^{\text{e}}$ ), 8.88 (dd,  $J_{\text{H-H}} = 8.1, 4.1$  Hz, 3H;  $\text{H}^{\text{g}}, \text{H}^{\text{g}'}, \text{H}^{\text{h}}$ ), 8.80 (d,  $J_{\text{H-H}} = 8.1$  Hz, 1H;  $\text{H}^{\text{h}}$ ), 8.24 (t,  $J_{\text{H-H}} = 7.9$  Hz, 2H;  $\text{H}^{\text{d}}, \text{H}^{\text{d}}$ ), 8.15 (dt,  $J_{\text{H-H}} = 10.6, 7.6$  Hz, 2H;  $\text{H}^{\text{i}}, \text{H}^{\text{i}'}$ ), 8.08 (t,  $J_{\text{H-H}} = 7.5$  Hz, 1H;  $\text{H}^{\text{a}}$ ), 7.96 (d,  $J_{\text{H-H}} = 5.7$  Hz, 1H;  $\text{H}^{\text{f}}$ ), 7.85 (d,  $J_{\text{H-H}} = 5.7$  Hz, 1H;  $\text{H}^{\text{j}}$ ), 7.82 – 7.76 (m, 2H,  $\text{H}^{\text{k}}, \text{H}^{\text{k}'}$ ), 7.74 (d,  $J = 8.3$  Hz, 1H,  $\text{H}^{\text{b}}$ ), 7.70 (d,  $J = 5.6$  Hz, 1H,  $\text{H}^{\text{l}}$ ), 7.63 – 7.57 (m, 1H,  $\text{H}^{\text{c}}$ ), 7.52 (dq,  $J = 13.5, 6.6$  Hz, 4H,  $\text{H}^{\text{5}}, \text{H}^{\text{11}}, \text{H}^{\text{11}'}, \text{H}^{\text{5}'}$ ), 7.36 (t,  $J = 7.7$  Hz, 1H,  $\text{H}^{\text{k}}$ ), 7.02 (t,  $J = 7.8$  Hz, 1H,  $\text{H}^{\text{l}}$ ), 5.65 (d,  $J = 8.3$  Hz, 1H,  $\text{H}^{\text{m}}$ ) ppm.  $^{13}\text{C}\{^1\text{H}\}$  NMR spectra data is not available due to decomposition signs observed in  $\text{DMSO-d}_6$ . **FT-IR (ATR) selected bands:** 3376 (w,  $\nu_{\text{N-H}}$ ), 3012 (w,  $\nu_{\text{C-H}}$ ), 1602-1541 (m,  $\nu_{\text{C=C}} + \nu_{\text{C-N}}$ ), 1419 (w,  $\nu_{\text{C=N}}$ ), 1151 (m,  $\nu_{\text{C-C}}$ ), 1065-1023 (m,  $\delta_{\text{C-Hip}}$ ), 764-730 (vs,  $\delta_{\text{C-Hoop}}$ ). **HR-MS ESI(+)(DCM/DMSO, 4:1):**  $[\text{M-H}]^+$  calcd. for  $[\text{C}_{32}\text{H}_{24}\text{N}_7\text{Ru}]^+$  608.1137; found 608.1145;  $[\text{M}]^{2+}$  calcd. for  $[\text{C}_{32}\text{H}_{25}\text{N}_7\text{Ru}]^{2+}$  304.5602 found 304.5612 Da. **Anal. Calcd for  $\text{C}_{32}\text{H}_{25}\text{Cl}_2\text{N}_7\text{Ru}(\text{H}_2\text{O})_{0.35}$ :** C 56.04; H 3.78; N 14.29; **Found:** C 56.25; H 4.01; N 14.25.

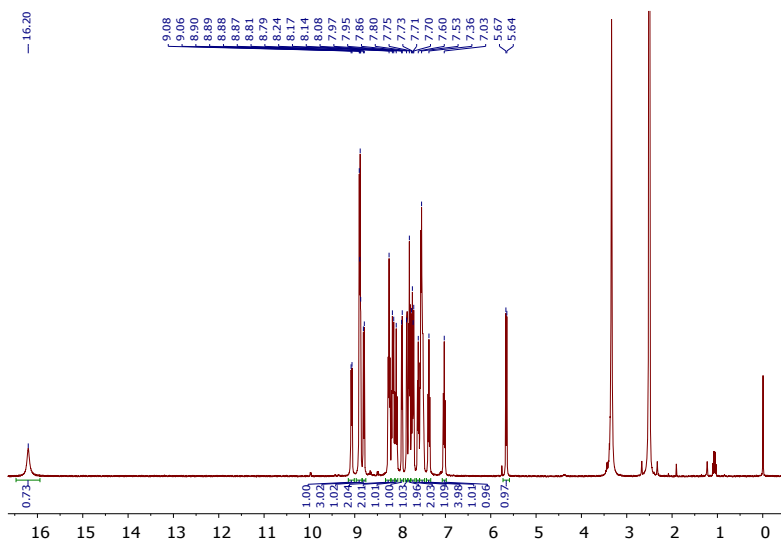

Figure S11.  $^1\text{H NMR}$  (400 MHz,  $\text{DMSO-d}_6$ , 25 °C) spectrum of  $[\text{Ru1}]\text{Cl}_2$ .

## Synthesis of $[\text{Ru}(\text{bpy})_2(\text{L2})]\text{Cl}_2$ , $[\text{Ru}_2]\text{Cl}_2$

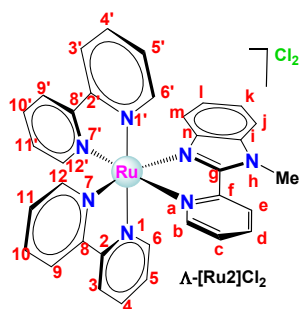

In a 100 mL Schlenk flask, the ancillary ligand **L2** (0.040 g, 0.192 mmol) was added to a solution of  $\text{RuCl}_2(\text{bpy})_2 \cdot 2\text{H}_2\text{O}$  (0.100 g, 0.192 mmol) in ethanol (19 mL), and the mixture was stirred at 90 °C for 16 h. Then, the volume was reduced to the half under vacuum and diethyl ether (15 mL) was added to precipitate a crude solid that was isolated by filtration and washed with diethyl ether (5 mL). The solid was dissolved in methanol/acetone 1:1 (0.75 mL:0.75 mL) and placed in the freezer for 2 days to precipitate the excess of precursor. Then the solution was filtered, the solvent was removed under vacuum and the resulting solid was washed with  $\text{Et}_2\text{O}$  (5 mL), and dried under vacuum at 80 °C for 6 h. Dark Red solid. Yield: 0.041 g (0.059 mmol, 31%).  $^1\text{H}$  NMR (400 MHz,  $\text{DMSO-d}_6$ , 25 °C)  $\delta$  8.91 (d,  $J_{\text{H-H}} = 8.2$  Hz, 3H;  $\text{H}^3, \text{H}^9, \text{H}^{9'}$ ), 8.81 (dd,  $J_{\text{H-H}} = 8.2, 4.3$  Hz, 2H;  $\text{H}^3, \text{H}^e$ ), 8.24 (m, 2H;  $\text{H}^4, \text{H}^{10}$ ), 8.15 (m, 2H;  $\text{H}^{10'}, \text{H}^4$ ), 8.09 (td,  $J_{\text{H-H}} = 7.9, 1.2$  Hz, 1H;  $\text{H}^d$ ), 8.01 (d,  $J_{\text{H-H}} = 8.5$  Hz, 1H;  $\text{H}^i$ ), 7.91 (d,  $J_{\text{H-H}} = 5.0$  Hz, 1H;  $\text{H}^6$ ), 7.82 (d,  $J_{\text{H-H}} = 5.5$  Hz, 1H;  $\text{H}^6$ ), 7.79 (d,  $J_{\text{H-H}} = 5.57$  Hz, 2H;  $\text{H}^b$  or  $\text{H}^{12'}$ ), 7.77 (d,  $J_{\text{H-H}} = 5.2$  Hz, 2H;  $\text{H}^b$  or  $\text{H}^{12'}$ ), 7.73 (d,  $J_{\text{H-H}} = 5.1$  Hz, 1H;  $\text{H}^{12}$ ), 7.57 (m, 4H;  $\text{H}^5, \text{H}^5, \text{H}^{11}, \text{H}^{11'}$ ), 7.46 (m, 2H;  $\text{H}^c, \text{H}^k$ ), 7.08 (t,  $J_{\text{H-H}} = 7.8$  Hz, 1H;  $\text{H}^l$ ), 5.68 (d,  $J_{\text{H-H}} = 8.4$  Hz, 1H;  $\text{H}^m$ ), 4.47 (s, 3H;  $\text{H}^{\text{N-Me}}$ ) ppm.  $^{13}\text{C}\{^1\text{H}\}$  NMR spectra data is not available due to decomposition signs observed in  $\text{DMSO-d}_6$ . **FT-IR (ATR) selected bands:** 3063 (w,  $\nu_{\text{C-H}}$ ), 1601-1565 (m,  $\nu_{\text{C=C+C-N}}$ ), 1420 (w,  $\nu_{\text{C=N}}$ ), 1162 (m,  $\nu_{\text{C-C}}$ ), 1025 (m,  $\delta_{\text{C-Hip}}$ ), 806 (w,  $\delta_{\text{C-C}}$ ), 745-731 (vs,  $\delta_{\text{C-Hoop}}$ ). **HR-MS ESI(+)(DCM/DMSO, 4:1):**  $m/z$   $[\text{M-Me}]^+$  calcd. for  $[\text{C}_{32}\text{H}_{24}\text{N}_7\text{Ru}]^+$  608.1131 found 608.1140 Da;  $[\text{M-L2+Cl}]^+$  calcd. for  $[\text{C}_{20}\text{H}_{16}\text{N}_4\text{RuCl}]^+$  449.0102; found 449.0106 Da;  $[\text{M}]^{2+}$  calcd. for  $[\text{C}_{33}\text{H}_{27}\text{N}_7\text{Ru}]^{2+}$  311.5680; found 311.5693. **Anal. Calcd for  $\text{C}_{33}\text{H}_{27}\text{Cl}_2\text{N}_7\text{Ru}(\text{H}_2\text{O})_{0.32}$ :** C 56.67; H 3.98; N 14.02; **Found:** C 56.80; H 4.13; N 14.29.

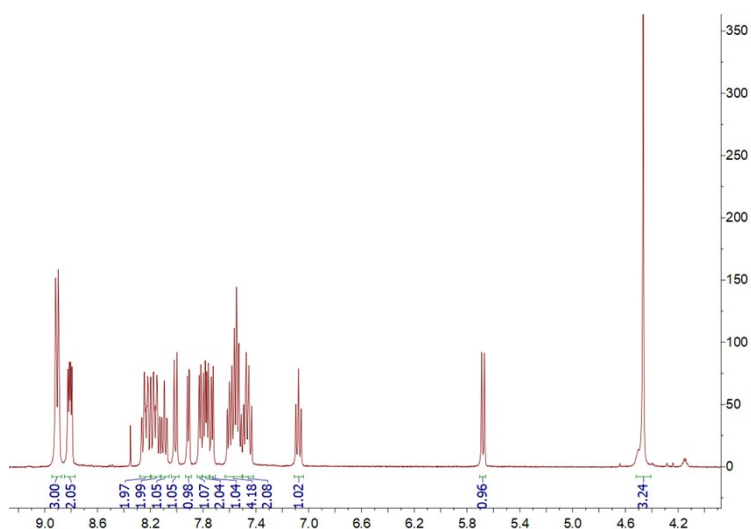

Figure S12.  $^1\text{H}$  NMR (400 MHz,  $\text{DMSO-d}_6$ , 25 °C) spectrum of  $[\text{Ru}_2]\text{Cl}_2$ .

## Synthesis of [Ru(bpy)<sub>2</sub>(L3)]Cl<sub>2</sub>, [Ru<sub>3</sub>]Cl<sub>2</sub>

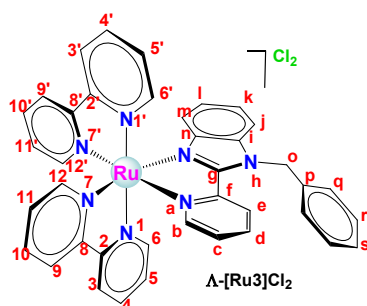

In a 100 mL Schlenk flask, the ancillary ligand **L3** (0.055 g, 0.193 mmol) was added to a solution of RuCl<sub>2</sub>(bpy)<sub>2</sub>·2H<sub>2</sub>O (0.100 g, 0.192 mmol) in ethanol (19 mL), and the mixture was stirred at 90 °C for 24 h. Then, the volume was reduced to the half under vacuum and diethyl ether (15 mL) was added to precipitate a crude solid that was isolated by filtration and washed with diethyl ether (5 mL). The solid was dissolved in water, filtered and dried under vacuum. The solid was washed with diethyl ether (5 mL) and dried under vacuum at 80 °C for 6 h. Dark red solid. Yield: 0.083 g (0.107 mmol, 56%). **<sup>1</sup>H NMR (400 MHz, DMSO-d<sub>6</sub>, 25 °C)** δ 8.93 (br s, 3H; H<sup>3</sup>, H<sup>9</sup>, H<sup>9'</sup>), 8.85 (d, *J*<sub>H-H</sub> = 8.3 Hz; 1H, H<sup>3'</sup>), 8.53 (d, *J*<sub>H-H</sub> = 8.3 Hz, 1H; H<sup>e</sup>), 8.27 (t, *J*<sub>H-H</sub> = 7.9 Hz, 1H; H<sup>4</sup>), 8.17 (m, 2H; H<sup>10</sup>, H<sup>10'</sup>), 8.11 (d, *J*<sub>H-H</sub> = 8.3 Hz, 1H; H<sup>b</sup>), 8.06 (m, 2H; H<sup>d</sup>, H<sup>4'</sup>), 7.97 (d, *J*<sub>H-H</sub> = 5.4 Hz, 1H; H<sup>6</sup>), 7.88 (d, *J*<sub>H-H</sub> = 5.4 Hz, 1H; H<sup>6'</sup>), 7.77 (m, 2H; H<sup>12</sup>, H<sup>12'</sup>), 7.68 (d, *J*<sub>H-H</sub> = 5.4 Hz, 1H; H<sup>i</sup>), 7.63 (m, 1H; H<sup>5</sup>), 7.50 (m, 5H; H<sup>11</sup>, H<sup>11'</sup>, H<sup>5'</sup>, H<sup>c</sup>, H<sup>k</sup>), 7.33 (m, 3H; H<sup>r</sup>, H<sup><r</sup>, H<sup>s</sup>), 7.14 (m, 1H; H<sup>l</sup>), 7.05 (s, H<sup>o</sup>), 7.03 (s, H<sup>o</sup>), 6.37 (d, *J*<sub>H-H</sub> = 17.9 Hz, 1H; H<sup>o</sup>), 6.29 (d, *J*<sub>H-H</sub> = 17.9 Hz, 1H, H<sup>o</sup>), 5.76 (d, *J* = 8.3 Hz, 1H; H<sup>m</sup>) ppm. **<sup>13</sup>C{<sup>1</sup>H} NMR (101 MHz, DMSO-d<sub>6</sub>, 25 °C)** δ 157.33, 156.91, 156.46, 152.44, 151.62, 151.20, 151.00, 150.55, 147.73, 139.77, 137.93, 137.72, 137.59, 137.54, 137.41, 136.64, 135.09, 128.95, 127.77, 127.74, 127.63, 127.59, 127.55, 127.43, 126.13, 125.59, 125.38, 125.14, 124.50, 124.37, 124.22, 123.98, 114.87, 112.85, 47.98 ppm. **FT-IR (ATR) selected bands:** 3065 (w, ν<sub>C-H</sub>), 1601-1565 (m, ν<sub>C=C</sub> + ν<sub>C-N</sub>), 1420 (w, ν<sub>C=N</sub>), 1157 (m, ν<sub>C-C</sub>), 1062-1015 (m, δ<sub>C-Hip</sub>), 773 (vs, δ<sub>C-Hoop</sub>). **HR-MS ESI(+)(DCM/DMSO, 4:1):** m/z [M-Bn]<sup>+</sup> calcd. for [C<sub>32</sub>H<sub>24</sub>N<sub>7</sub>Ru]<sup>+</sup> 608.1131; found 608.1138 Da; [M]<sup>2+</sup> calcd. for [C<sub>39</sub>H<sub>31</sub>N<sub>7</sub>Ru]<sup>2+</sup> 349.5837; found 349.5850 Da. **Anal. Calcd for C<sub>39</sub>H<sub>31</sub>Cl<sub>2</sub>N<sub>7</sub>Ru(H<sub>2</sub>O)<sub>0.85</sub>:** C 59.67; H 4.20; N 12.49; **Found:** C 59.79; H 4.35; N 12.70

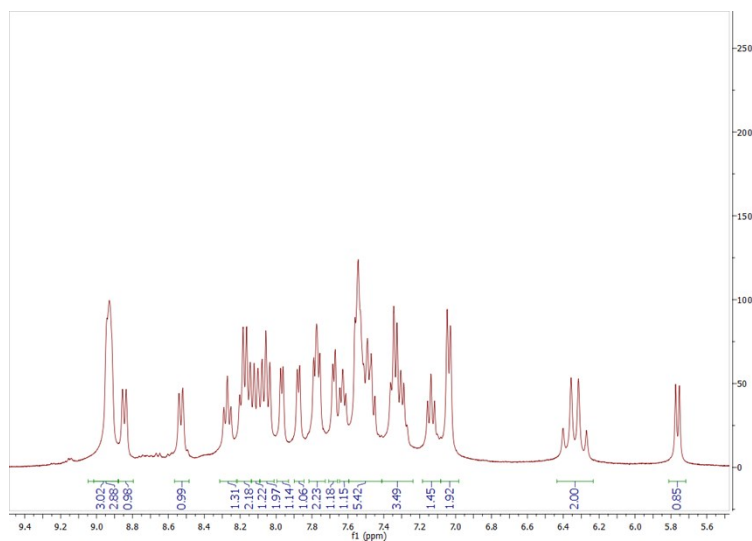

Figure S13. <sup>1</sup>H NMR (400 MHz, DMSO-d<sub>6</sub>, 25 °C) spectrum of [Ru<sub>3</sub>]Cl<sub>2</sub>.

## Synthesis of [Ru(bpy)<sub>2</sub>(L4)]Cl<sub>2</sub>, [Ru4]Cl<sub>2</sub>

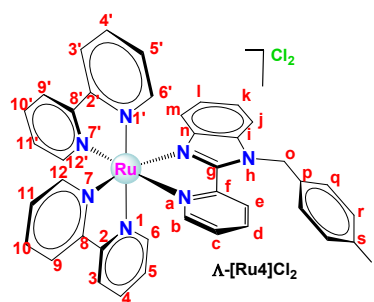

In a 100 mL Schlenk flask, the ancillary ligand **L4** (0.079 g, 0.192 mmol) was added to a solution of RuCl<sub>2</sub>(bpy)<sub>2</sub>·2H<sub>2</sub>O (0.100 g, 0.192 mmol) in ethanol (19 mL), and the mixture was stirred at 90 °C for 16 h. Then, the volume was reduced to the half under vacuum and diethyl ether (15 mL) was added to precipitate a crude solid that was isolated by filtration and washed with diethyl ether (5 mL). The solid was dissolved in methanol/acetone 1:1 (0.75/0.75 mL) and placed in the freezer for 2 days. Then the solution was filtered, dried under vacuum, washed with diethyl ether (5 mL) and finally, dried under vacuum at 80 °C for 6h. Dark red solid. Yield: 0.09 g (0.101 mmol, 53%). **<sup>1</sup>H NMR (400 MHz, DMSO-d<sub>6</sub>, 25 °C)** δ 8.90 (m, 3H; H<sup>3</sup>, H<sup>9</sup>, H<sup>9'</sup>), 8.82 (d, *J*<sub>H-H</sub> = 8.0 Hz, 1H; H<sup>3</sup>), 8.46 (d, *J*<sub>H-H</sub> = 8.4 Hz, 1H; H<sup>e</sup>), 8.27 (t, *J*<sub>H-H</sub> = 7.9 Hz, 1H; H<sup>4</sup>), 8.17 (q, *J*<sub>H-H</sub> = 7.9 Hz, 2H; H<sup>10</sup>, H<sup>10'</sup>), 8.09 (m, 2H; H<sup>4</sup>, H<sup>d</sup>), 8.01 (d, *J*<sub>H-H</sub> = 8.5 Hz, 1H; H<sup>i</sup>), 7.96 (d, *J*<sub>H-H</sub> = 5.3 Hz, 1H; H<sup>6</sup>), 7.85 (d, *J*<sub>H-H</sub> = 5.3 Hz, 1H; H<sup>12</sup>), 7.79 (d, *J*<sub>H-H</sub> = 5.2 Hz, 1H; H<sup>12</sup>), 7.75 (d, *J*<sub>H-H</sub> = 5.4 Hz, 1H; H<sup>6</sup>), 7.72 (s, 1H; H<sup>b</sup>), 7.62 (m, 2H; H<sup>r</sup>, H<sup>r</sup>), 7.62 (m, 1H; H<sup>5</sup>), 7.51 (m, 5; H<sup>11</sup>, H<sup>11'</sup>, H<sup>5</sup>, H<sup>c</sup>, H<sup>k</sup>), 7.13 (t, *J*<sub>H-H</sub> = 7.8 Hz, 1H; H<sup>l</sup>), 6.89 (s, 1H; H<sup>q</sup>), 6.86 (s, 1H; H<sup>q</sup>), 6.32 (d, *J*<sub>H-H</sub> = 18.1 Hz, 1H; H<sup>o</sup>), 6.24 (d, *J*<sub>H-H</sub> = 18.1 Hz, 1H; H<sup>o</sup>), 5.75 (d, *J* = 8.4 Hz, 1H, H<sup>m</sup>) ppm. **<sup>13</sup>C{<sup>1</sup>H} NMR (101 MHz, DMSO-d<sub>6</sub>, 25 °C)** δ 157.54, 157.13, 156.66, 156.64, 152.67, 151.78, 151.34, 150.68, 147.83, 139.99, 138.12, 137.84, 137.77, 137.66, 136.72, 135.10, 128.11, 127.84, 126.42, 125.49, 125.39, 124.66, 124.54, 124.13, 115.08, 113.00, 94.23, 47.80 ppm. **FT-IR (ATR) selected bands:** 3066 (w, ν<sub>C-H</sub>), 1601-1572 (m, ν<sub>C=C + C-N</sub>), 1439 (w, ν<sub>C-N</sub>), 1159 (m, ν<sub>C-C</sub>), 1060 (m, δ<sub>C-Hip</sub>), 762-746 (vs, δ<sub>C-Hoop</sub>). **HR-MS ESI(+)(DCM/DMSO, 4:1):** m/z [M-(4-I-Bn)]<sup>+</sup> calcd. for [C<sub>32</sub>H<sub>24</sub>N<sub>7</sub>Ru]<sup>+</sup> 608.1131; found 608.1143; [M]<sup>2+</sup> calcd. for 412.5320; found 412.5329. **Anal. Calcd for C<sub>39</sub>H<sub>30</sub>Cl<sub>2</sub>IN<sub>7</sub>Ru(H<sub>2</sub>O)<sub>0.64</sub>:** C 51.64; H 3.48; N 10.81; **Found:** C 51.69; H 3.60; N 11.03.

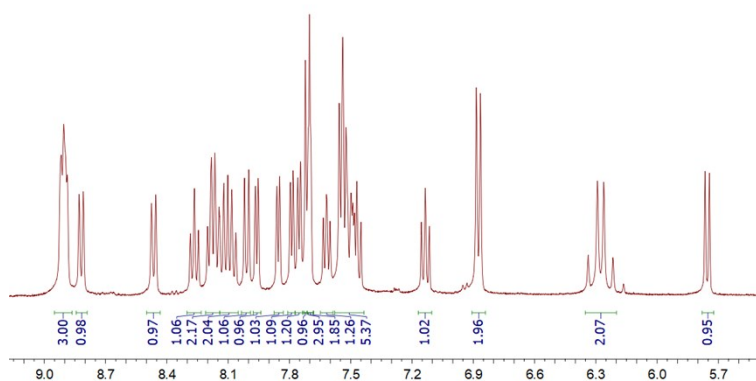

Figure S14. <sup>1</sup>H NMR (400 MHz, DMSO-d<sub>6</sub>, 25 °C) spectrum of [Ru4]Cl<sub>2</sub>.

## Synthesis of [Ru(bpy)<sub>2</sub>(L5)]Cl<sub>2</sub>, [Ru5]Cl<sub>2</sub>

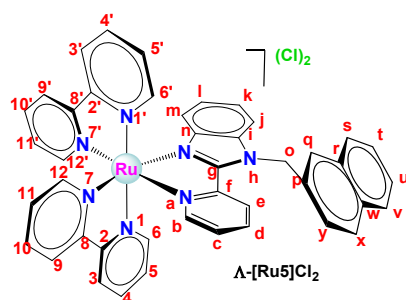

In a 100 mL Schlenk flask, the ancillary ligand **L5** (0.065 g, 0.193 mmol) was added to a solution of RuCl<sub>2</sub>(bpy)<sub>2</sub>·2H<sub>2</sub>O (0.100 g, 0.192 mmol) in ethanol (19 mL), and the mixture was stirred at 90 °C for 16 h. Then, the volume was reduced to the half under vacuum and diethyl ether (15 mL) was added to precipitate a crude solid that was isolated by filtration and washed with diethyl ether (5 mL). The solid was dissolved in ethanol/Acetone 1:1 (0.75/0.75 mL) and placed in the freezer for 3 days. Then the solution is filtered, dried under vacuum, washed with diethyl ether (5 mL) and dried under vacuum at 80 °C for 6 h. Dark red solid. Yield: 0.081 g (0.099 mmol, 51%). **<sup>1</sup>H NMR (400 MHz, DMSO-d<sub>6</sub>, 25 °C)** δ 8.92 (m, 3H; H<sup>3</sup>, H<sup>9</sup>, H<sup>9'</sup>), 8.86 (d, *J*<sub>H-H</sub> = 7.9 Hz, 1H; H<sup>3'</sup>), 8.50 (d, *J*<sub>H-H</sub> = 8.3 Hz, 1H; H<sup>e</sup>), 8.28 (t, *J*<sub>H-H</sub> = 7.7 Hz, 1H; H<sup>4</sup>), 8.17 (m, 3H; H<sup>10</sup>, H<sup>10'</sup>, H<sup>4'</sup>), 8.09 (d, *J*<sub>H-H</sub> = 8.4 Hz, 1H), 8.03 (m, 1H; H<sup>d</sup>), 7.97 (m; 3H), 7.91 (m, 1H), 7.74 (m; 4H), 7.64 (m, 1H; H<sup>5</sup>), 7.51 (m, 8H; H<sup>11</sup>, H<sup>11'</sup>, H<sup>5'</sup>, H<sup>c</sup>, H<sup>k</sup>, 3H<sub>arom</sub>), 7.29 (d, *J*<sub>H-H</sub> = 8.7 Hz, 1H), 7.16 (t, *J*<sub>H-H</sub> = 7.7 Hz, 1H; H<sup>l</sup>), 6.52 (d, *J*<sub>H-H</sub> = 18.1 Hz, 1H; H<sup>o</sup>), 6.42 (d, *J*<sub>H-H</sub> = 18.1 Hz, 1H; H<sup>o</sup>), 5.79 (d, *J*<sub>H-H</sub> = 8.2 Hz, 1H; H<sup>m</sup>) ppm. **<sup>13</sup>C{<sup>1</sup>H} NMR (101 MHz, DMSO-d<sub>6</sub>, 25 °C)** δ 157.58, 157.13, 156.69, 152.64, 151.93, 151.84, 151.37, 151.32, 150.81, 147.91, 140.08, 138.13, 137.91, 137.82, 137.75, 137.60, 136.91, 132.96, 132.75, 132.37, 131.45, 129.01, 127.95, 127.87, 127.80, 127.72, 127.67, 127.64, 126.76, 126.44, 126.37, 126.33, 125.55, 125.38, 124.68, 124.55, 124.43, 124.22, 124.15, 123.93, 115.14, 113.12, 48.45 ppm. **FT-IR (ATR) selected bands:** 3065 (w, ν<sub>C-H</sub>), 1601-1576 (m, ν<sub>C=C + C-N</sub>), 1421 (w, ν<sub>C=N</sub>), 1157 (m, ν<sub>C-C</sub>), 1062-1013 (m, δ<sub>C-Hip</sub>), 763-746 (vs, δ<sub>C-Hoop</sub>). **HR-MS ESI(+)(DCM/DMSO, 4:1):** m/z [M-(CH<sub>2</sub>-Naphthyl)]<sup>+</sup> calcd. for [C<sub>32</sub>H<sub>24</sub>N<sub>7</sub>Ru]<sup>+</sup> 608.1131; found 608.1130; [M]<sup>2+</sup> calcd. for [C<sub>43</sub>H<sub>33</sub>N<sub>7</sub>Ru]<sup>2+</sup> 374.5915; found 374.5924. **Anal. Calcd for C<sub>43</sub>H<sub>33</sub>Cl<sub>2</sub>N<sub>7</sub>Ru(H<sub>2</sub>O)<sub>0.75</sub>:** C 61.98; H 4.17; N 11.77; **Found:** C 61.90; H 4.32; N 12.01.

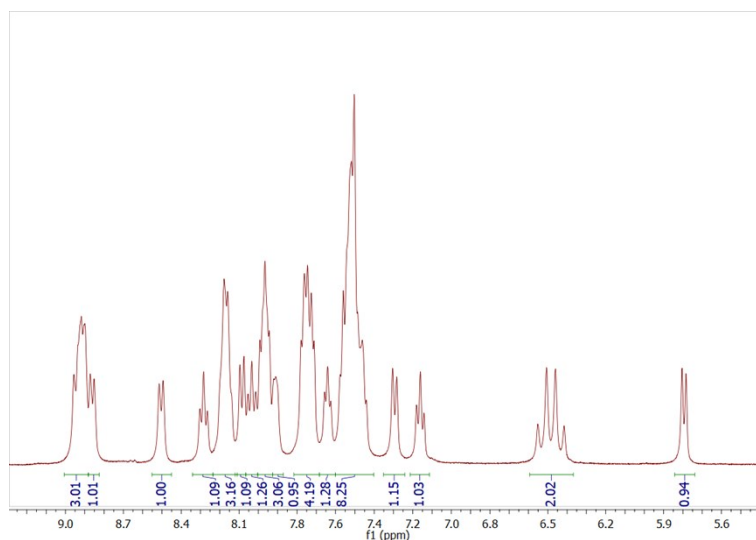

Figure S15. <sup>1</sup>H NMR (400 MHz, DMSO-d<sub>6</sub>, 25 °C) spectrum of [Ru5]Cl<sub>2</sub>.

### 3.- X-Ray diffraction: Crystallographic parameters and spatial interactions

|                                             |                                                                                  |
|---------------------------------------------|----------------------------------------------------------------------------------|
| Empirical formula                           | C <sub>39</sub> H <sub>31</sub> F <sub>12</sub> N <sub>7</sub> P <sub>2</sub> Ru |
| Formula weight                              | 988.72                                                                           |
| Temperature/K                               | 299.0                                                                            |
| Crystal system                              | monoclinic                                                                       |
| Space group                                 | P2 <sub>1</sub> /c                                                               |
| a/Å                                         | 20.7784(11)                                                                      |
| b/Å                                         | 11.5929(6)                                                                       |
| c/Å                                         | 16.7092(8)                                                                       |
| α/°                                         | 90                                                                               |
| β/°                                         | 97.550(2)                                                                        |
| γ/°                                         | 90                                                                               |
| Volume/Å <sup>3</sup>                       | 3990.1(4)                                                                        |
| Z                                           | 4                                                                                |
| ρ <sub>calc</sub> /cm <sup>3</sup>          | 1.646                                                                            |
| μ/mm <sup>-1</sup>                          | 0.570                                                                            |
| F(000)                                      | 1984.0                                                                           |
| Crystal size/mm <sup>3</sup>                | 0.3 × 0.1 × 0.1                                                                  |
| Radiation                                   | MoKα (λ = 0.71073)                                                               |
| 2θ range for data collection/°              | 4.586 to 55.444                                                                  |
| Index ranges                                | -27 ≤ h ≤ 26, -15 ≤ k ≤ 15, -20 ≤ l ≤ 21                                         |
| Reflections collected                       | 64983                                                                            |
| Independent reflections                     | 9267 [R <sub>int</sub> = 0.1518, R <sub>sigma</sub> = 0.0875]                    |
| Data/restraints/parameters                  | 9267/0/551                                                                       |
| Goodness-of-fit on F <sup>2</sup>           | 1.090                                                                            |
| Final R indexes [I >= 2σ (I)]               | R <sub>1</sub> = 0.0631, wR <sub>2</sub> = 0.1459                                |
| Final R indexes [all data]                  | R <sub>1</sub> = 0.1576, wR <sub>2</sub> = 0.2238                                |
| Largest diff. peak/hole / e Å <sup>-3</sup> | 1.23/-0.85                                                                       |



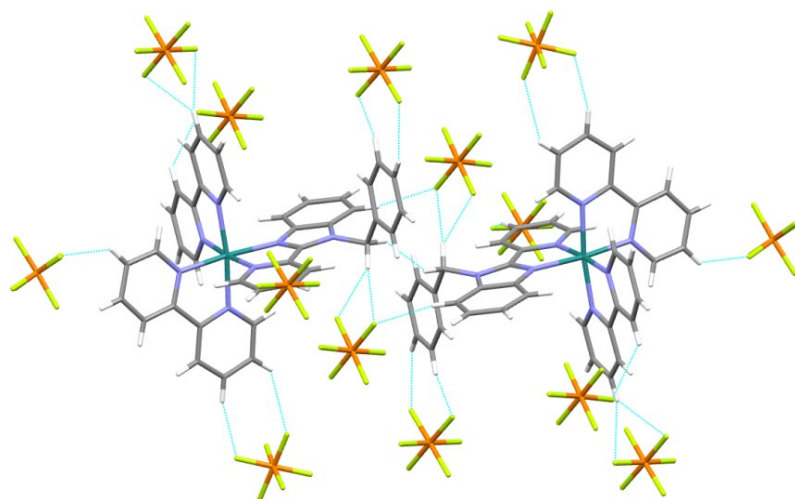

**Figure S16.** Intermolecular Hydrogen bonding interactions in the crystal structure of  $[\text{Ru}_3](\text{PF}_6)_2$ .

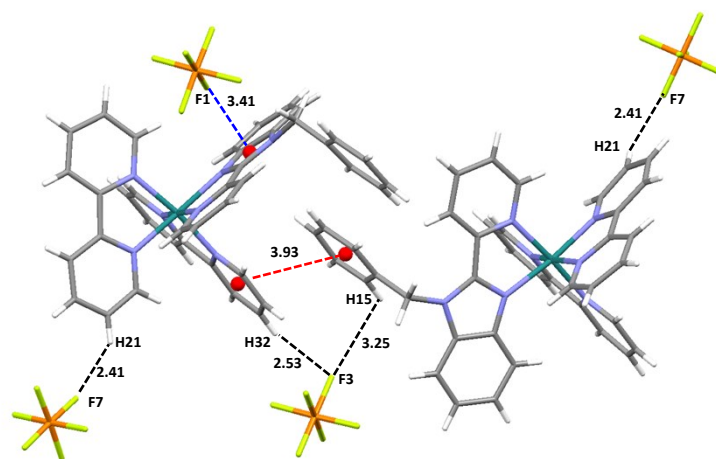

| Geometric data for the $\pi \cdots \pi$ interaction in complex $[\text{Ru}_3](\text{PF}_6)_2$ |           |                |              |                      |
|-----------------------------------------------------------------------------------------------|-----------|----------------|--------------|----------------------|
| Groups involved                                                                               | Ct–Ct (Å) | Ct–pl (Å)      | $\alpha$ (°) | $\beta$ and $\gamma$ |
| Ring 1: C14–C19                                                                               | 3.93      | 3.51 (Ct1–pl2) | 5.21         | 26.7                 |
| Ring 2: N7,C30–C34                                                                            |           | 3.33 (Ct2–pl1) |              | 32.1                 |

Ct = centroid, pl = plane.  $\beta$  and  $\gamma$  are the angles formed by the centroid–centroid and centroid–plane lines.  $\alpha$  is the dihedral angle formed by the plane of the two rings of the  $\pi$ – $\pi$  stacking.

| Geometric data for the anion $\cdots \pi$ interaction in complex $[\text{Ru}_3](\text{PF}_6)_2$ |          |          |             |
|-------------------------------------------------------------------------------------------------|----------|----------|-------------|
| Groups involved                                                                                 | F–Ct (Å) | F–pl (Å) | $\beta$ (°) |
| $\text{F}_5\text{P1–F1} \cdots \pi$ (Imidazole ring, N2,N3,C6,C7,C12)                           | 3.41     | 3.00     | 28.4        |

Ct = centroid, pl = plane.  $\beta$  is the angle formed by the H–centroid and H–plane lines.

**Figure S17.** Selected non-covalent interactions present in the crystal structure of complex  $[\text{Ru}_3](\text{PF}_6)_2$ .  $\pi \cdots \pi$  interaction in red, anion  $\cdots \pi$  interaction in blue and hydrogen bonds in black. There are more hydrogen bonds than those indicated.

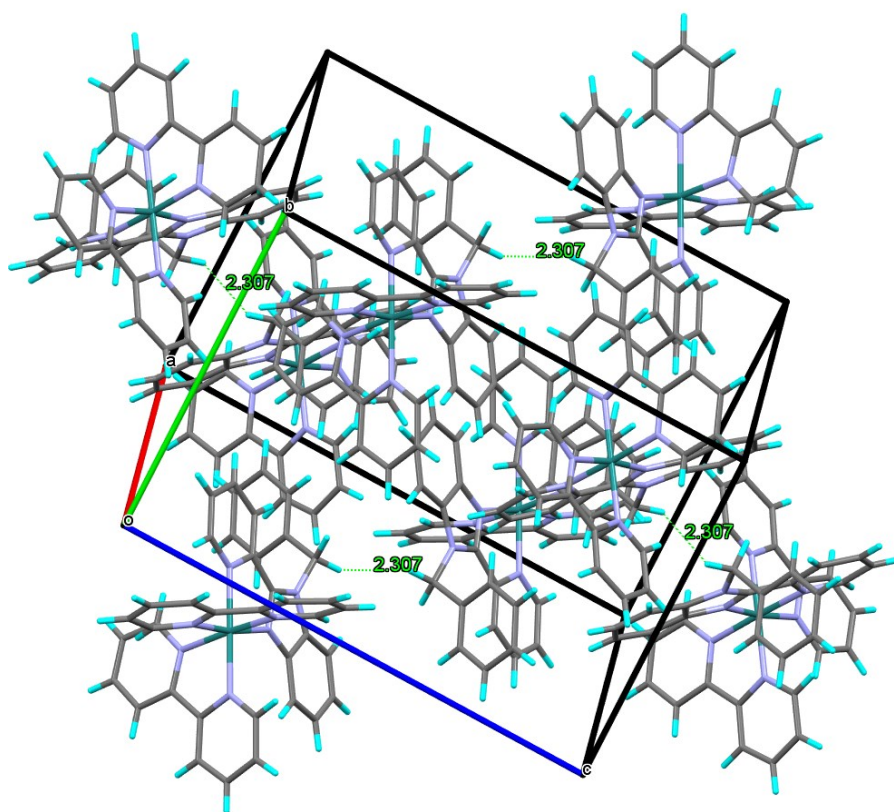

**Figure S18.** CH-CH interactions in the unit cell of the crystal structure of  $[\text{Ru}_3](\text{PF}_6)_2$  that involves the  $\text{CH}_2$  groups.

#### 4.- Photostability of the Ruthenium(II) complexes

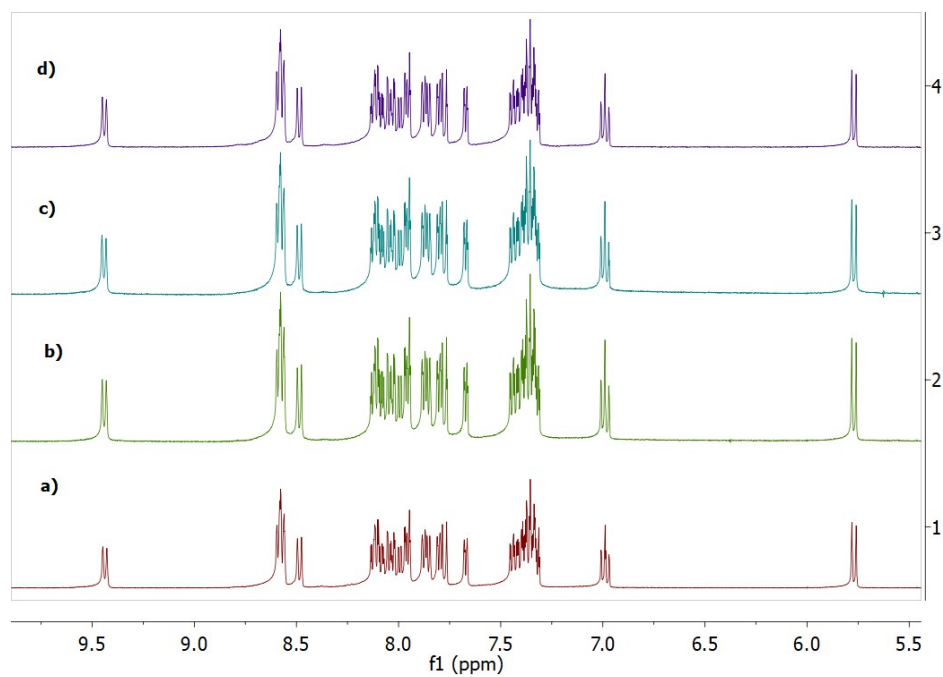

**Figure S19.** Aromatic Area of  $^1\text{H}$  NMR (400 MHz) spectra of  $[\text{Ru}_1]\text{Cl}_2$  in  $\text{CD}_3\text{CN}$  ( $1.4 \cdot 10^{-2}$  M) at  $25^\circ\text{C}$  after irradiation with Blue LED light ( $\lambda=460$  nm): a)  $t=0$ , b)  $t=2$  h, c)  $t=6$  h and d)  $t=24$  h.

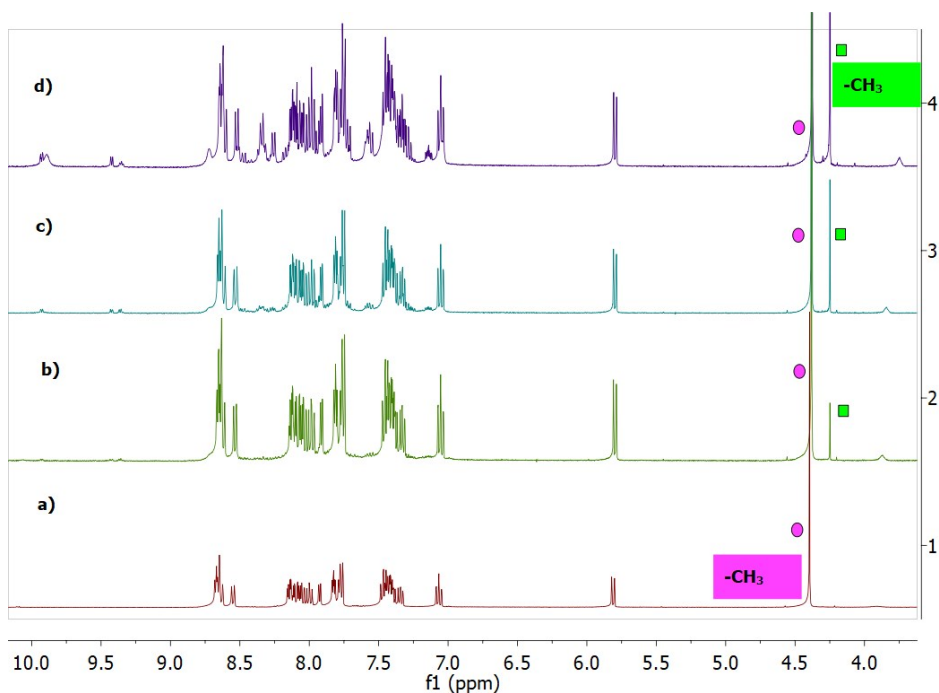

**Figure S110.** Aromatic Area of  $^1\text{H}$  NMR (400 MHz) spectra of  $[\text{Ru}_2]\text{Cl}_2$  (pink circles) in  $\text{CD}_3\text{CN}$  ( $1.4 \cdot 10^{-2}$  M) at 25 °C after irradiation with Blue LED light ( $\lambda=460$  nm): a)  $t=0$ , b)  $t=2$  h, c)  $t=6$  h and d)  $t=24$  h. (green squares = **L2**)

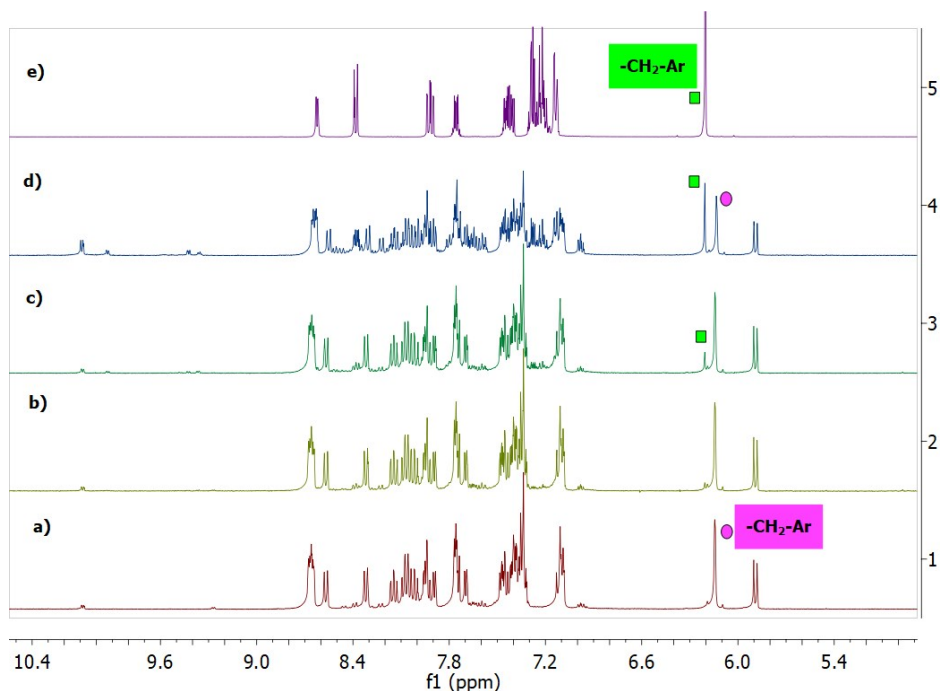

**Figure S111.** Aromatic Area of  $^1\text{H}$  NMR (400 MHz) spectra of  $[\text{Ru}_3]\text{Cl}_2$  (pink circles) in  $\text{CD}_3\text{CN}$  ( $1.4 \cdot 10^{-2}$  M) at 25 °C after irradiation with Blue LED light ( $\lambda=460$  nm): a)  $t=0$ , b)  $t=2$  h, c)  $t=6$  h and d)  $t=24$  h, e) **L3** (green squares).

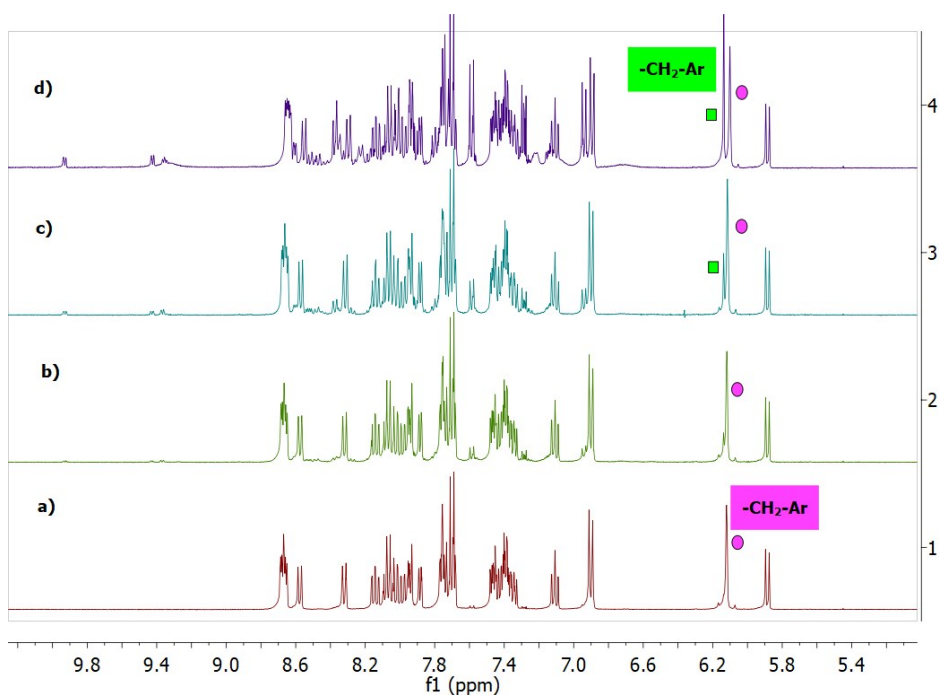

**Figure S112.** Aromatic Area of  $^1\text{H}$  NMR (400 MHz) spectra of  $[\text{Ru}4]\text{Cl}_2$  (pink circle) in  $\text{CD}_3\text{CN}$  ( $1.4 \cdot 10^{-2}$  M) at  $25^\circ\text{C}$  after irradiation with Blue LED light ( $\lambda=460$  nm): a)  $t=0$ , b)  $t=2$  h, c)  $t=6$  h and d)  $t=24$  h. (green squares = **L4**).

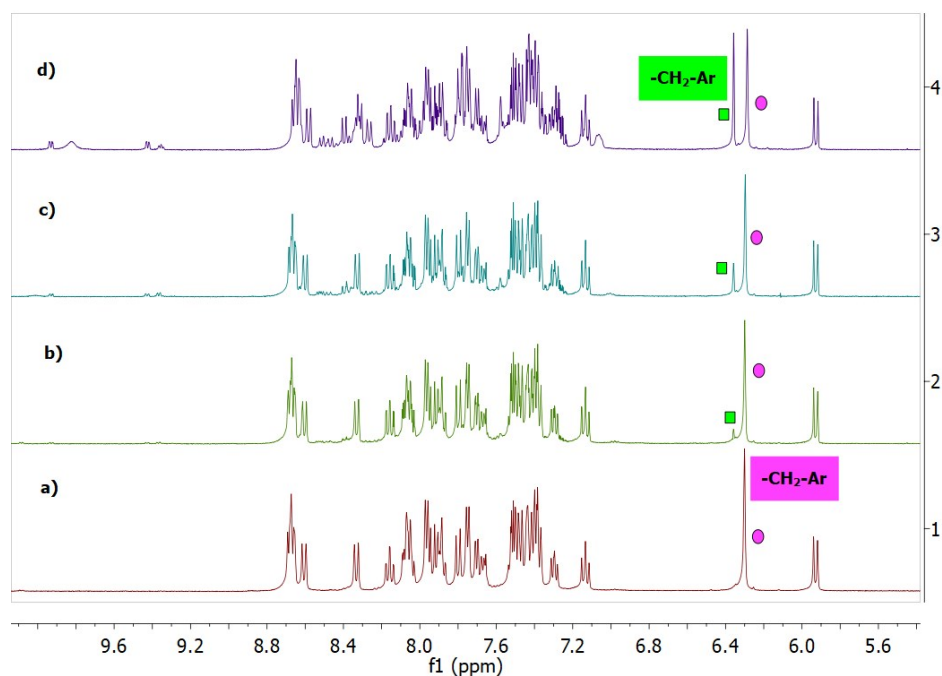

**Figure S113.** Aromatic Area of  $^1\text{H}$  NMR (400 MHz) spectra of  $[\text{Ru}5]\text{Cl}_2$  (pink circle) in  $\text{CD}_3\text{CN}$  ( $1.4 \cdot 10^{-2}$  M) at  $25^\circ\text{C}$  after irradiation with Blue LED light ( $\lambda=460$  nm): a)  $t=0$ , b)  $t=2$  h, c)  $t=6$  h and d)  $t=24$  h (green squares = **L5**).

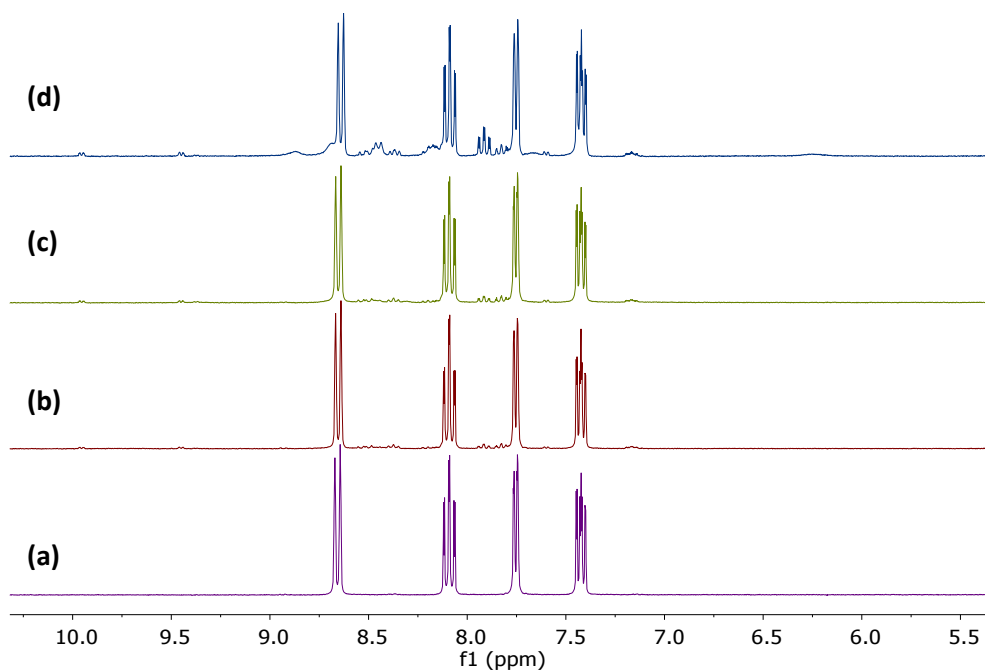

**Figure S114.** Aromatic Area of <sup>1</sup>H NMR (400 MHz) spectra of **[1]Cl<sub>2</sub>** in CD<sub>3</sub>CN (1.4·10<sup>-2</sup> M) at 25 °C after irradiation with Blue LED light (λ=460 nm): a) t= 0, b) t= 4 h, c) t= 6 h, d) t= 24 h.

## 5. Theoretical Calculations

Density functional theory (DFT) calculations were carried out with the D.01 revision of the Gaussian 09 package,<sup>6</sup> using the Becke's three-parameter B3LYP exchange-correlation functional,<sup>7,8</sup> together with the 6-31G(d,p) basis set for H, C, N, O, F, and S,<sup>9,10</sup> and the "double-zeta" quality LANL2DZ basis set for the Ru element.<sup>11</sup> The geometries of the singlet ground state ( $S_0$ ) and the lowest-energy triplet state (T1) were fully optimized without imposing any symmetry restriction. The geometries of the triplet states were calculated at the spin-unrestricted UB3LYP level with a spin multiplicity of 3. All the calculations were performed in the presence of the solvent (acetonitrile). Solvent effects were considered within the self-consistent reaction field (SCRF) theory using the SMD keyword that performs a polarized continuum model (IEFPCM)<sup>11</sup> calculation using the solvation model of Thurler et al.<sup>12</sup> Time-dependent DFT (TD-DFT) calculations of the lowest-lying 15 singlets and triplets were performed in the presence of the solvent at the minimum-energy geometry optimized for the ground state ( $S_0$ ).

---

<sup>6</sup> M. J. Frisch, G. W. Trucks, H. B. Schlegel, G. E. Scuseria, M. A. Robb, J. R. Cheeseman, G. Scalmani, V. Barone, B. Mennucci, G. A. Petersson, H. Nakatsuji, M. Caricato, X. Li, H. P. Hratchian, A. F. Izmaylov, J. Bloino, G. Zheng, J. L. Sonnenberg, M. Hada, M. Ehara, K. Toyota, R. Fukuda, J. Hasegawa, M. Ishida, T. Nakajima, Y. Honda, O. Kitao, H. Nakai, T. Vreven, J. A. Montgomery, Jr., J. E. Peralta, F. Ogliaro, M. Bearpark, J. J. Heyd, E. Brothers, K. N. Kudin, V. N. Staroverov, R. Kobayashi, J. Normand, K. Raghavachari, A. Rendell, J. C. Burant, S. S. Iyengar, J. Tomasi, M. Cossi, N. Rega, J. M. Millam, M. Klene, J. E. Knox, J. B. Cross, V. Bakken, C. Adamo, J. Jaramillo, R. Gomperts, R. E. Stratmann, O. Yazyev, A. J. Austin, R. Cammi, C. Pomelli, J. W. Ochterski, R. L. Martin, K. Morokuma, V. G. Zakrzewski, G. A. Voth, P. Salvador, J. J. Dannenberg, S. Dapprich, A. D. Daniels, Ö. Farkas, J. B. Foresman, J. V. Ortiz, J. Cioslowski, and D. J. Fox, *Gaussian 09* (Gaussian, Inc., Wallingford CT, 2009)

<sup>7</sup> A. D. Becke, *J. Chem. Phys.* **1993**, *98*, 5648–5652

<sup>8</sup> C. Lee, W. Yang, R. G. Parr, *Phys. Rev. B* **1988**, *37*, 785–789.

<sup>9</sup> M. M. Francl, W. J. Pietro, W. J. Hehre, J. S. Binkley, M. S. Gordon, D. J. DeFrees, J. A. Pople, *J. Chem. Phys.* **1982**, *77*, 3654–3665

<sup>10</sup> P. C. Hariharan, J. A. Pople, *Theor. Chim. Acta* **1973**, *28*, 213–222

<sup>11</sup> G. Scalmani, M. J. Frisch, *J. Chem. Phys.* **2010**, *132*, 114110.

<sup>12</sup> A. V Marenich, C. J. Cramer, D. G. Truhlar, *J. Phys. Chem. B* **2009**, *113*, 6378–6396.

**Table SI2.** Lowest triplet excited states calculated at the TD-DFT B3LYP/(6-31G\*\*+LANL2DZ) level for complexes [Ru1]<sup>2+</sup> to [Ru3]<sup>2+</sup> in acetonitrile solution. Vertical excitation energies (E), dominant monoexcitations with contributions (within parentheses) greater than 15%, nature of the electronic transition and description of the excited state are summarized. H and L denote HOMO and LUMO, respectively.

| Compound                               | State          | E (eV; nm) / f     | Monoexcitations                      | Nature                                                                                                                                                                                                                                       | Description                                                                                                                                                             |
|----------------------------------------|----------------|--------------------|--------------------------------------|----------------------------------------------------------------------------------------------------------------------------------------------------------------------------------------------------------------------------------------------|-------------------------------------------------------------------------------------------------------------------------------------------------------------------------|
| [Ru1]Cl <sub>2</sub>                   | S <sub>1</sub> | 2.64; 469 / 0.0007 | H→L (52)<br>H→L+2 (48)               | d <sub>π</sub> (Ru) + π <sub>L1</sub> → π* <sub>bpy</sub> + π* <sub>L1</sub><br>d <sub>π</sub> (Ru) + π <sub>L1</sub> → π* <sub>bpy</sub> + π* <sub>L1</sub>                                                                                 | <sup>1</sup> MLCT/ <sup>1</sup> LLCT/ <sup>1</sup> LC<br><sup>1</sup> MLCT/ <sup>1</sup> LLCT/ <sup>1</sup> LC                                                          |
|                                        | S <sub>2</sub> | 2.67; 464 / 0.0022 | H→L (28)<br>H→L+1 (47)<br>H→L+2 (20) | d <sub>π</sub> (Ru) + π <sub>L1</sub> → π* <sub>bpy</sub> + π* <sub>L1</sub><br>d <sub>π</sub> (Ru) + π <sub>L1</sub> → π* <sub>bpy</sub> + π* <sub>L1</sub><br>d <sub>π</sub> (Ru) + π <sub>L1</sub> → π* <sub>bpy</sub> + π* <sub>L1</sub> | <sup>1</sup> MLCT/ <sup>1</sup> LLCT/ <sup>1</sup> LC<br><sup>1</sup> MLCT/ <sup>1</sup> LLCT/ <sup>1</sup> LC<br><sup>1</sup> MLCT/ <sup>1</sup> LLCT/ <sup>1</sup> LC |
|                                        | S <sub>3</sub> | 2.70; 459 / 0.0034 | H→L (20)<br>H→L+1 (44)<br>H→L+2 (31) | d <sub>π</sub> (Ru) + π <sub>L1</sub> → π* <sub>bpy</sub> + π* <sub>L1</sub><br>d <sub>π</sub> (Ru) + π <sub>L1</sub> → π* <sub>bpy</sub> + π* <sub>L1</sub><br>d <sub>π</sub> (Ru) + π <sub>L1</sub> → π* <sub>bpy</sub> + π* <sub>L1</sub> | <sup>1</sup> MLCT/ <sup>1</sup> LLCT/ <sup>1</sup> LC<br><sup>1</sup> MLCT/ <sup>1</sup> LLCT/ <sup>1</sup> LC<br><sup>1</sup> MLCT/ <sup>1</sup> LLCT/ <sup>1</sup> LC |
|                                        | T <sub>1</sub> | 2.43; 510 / ----   | H→L+1 (52)<br>H→L+2 (34)             | d <sub>π</sub> (Ru) + π <sub>L1</sub> → π* <sub>bpy</sub> + π* <sub>L1</sub><br>d <sub>π</sub> (Ru) + π <sub>L1</sub> → π* <sub>bpy</sub> + π* <sub>L1</sub>                                                                                 | <sup>3</sup> MLCT/ <sup>3</sup> LLCT/ <sup>3</sup> LC<br><sup>3</sup> MLCT/ <sup>3</sup> LLCT/ <sup>3</sup> LC                                                          |
|                                        | T <sub>2</sub> | 2.50; 497 / ----   | H→L+1 (44)<br>H→L+2 (50)             | d <sub>π</sub> (Ru) + π <sub>L1</sub> → π* <sub>bpy</sub> + π* <sub>L1</sub><br>d <sub>π</sub> (Ru) + π <sub>L1</sub> → π* <sub>bpy</sub> + π* <sub>L1</sub>                                                                                 | <sup>3</sup> MLCT/ <sup>3</sup> LLCT/ <sup>3</sup> LC<br><sup>3</sup> MLCT/ <sup>3</sup> LLCT/ <sup>3</sup> LC                                                          |
|                                        | T <sub>3</sub> | 2.52; 491 / ----   | H→L (72)                             | d <sub>π</sub> (Ru) + π <sub>Lx</sub> → π* <sub>bpy</sub> + π* <sub>L1</sub>                                                                                                                                                                 | <sup>3</sup> MLCT/ <sup>3</sup> LLCT/ <sup>3</sup> LC                                                                                                                   |
| [Ru2]Cl <sub>2</sub>                   | S <sub>1</sub> | 2.61; 474 / 0.0007 | H→L (48)<br>H→L+2 (48)               | d <sub>π</sub> (Ru) + π <sub>L2</sub> → π* <sub>bpy</sub> + π* <sub>L2</sub><br>d <sub>π</sub> (Ru) + π <sub>L2</sub> → π* <sub>bpy</sub> + π* <sub>L2</sub>                                                                                 | <sup>1</sup> MLCT/ <sup>1</sup> LLCT/ <sup>1</sup> LC<br><sup>1</sup> MLCT/ <sup>1</sup> LLCT/ <sup>1</sup> LC                                                          |
|                                        | S <sub>2</sub> | 2.65; 469 / 0.0023 | H→L (21)<br>H→L+1 (64)               | d <sub>π</sub> (Ru) + π <sub>L2</sub> → π* <sub>bpy</sub> + π* <sub>L2</sub><br>d <sub>π</sub> (Ru) + π <sub>L2</sub> → π* <sub>bpy</sub> + π* <sub>L2</sub>                                                                                 | <sup>1</sup> MLCT/ <sup>1</sup> LLCT/ <sup>1</sup> LC<br><sup>1</sup> MLCT/ <sup>1</sup> LLCT/ <sup>1</sup> LC                                                          |
|                                        | S <sub>3</sub> | 2.68; 463 / 0.0049 | H→L (30)<br>H→L+1 (22)<br>H→L+2 (41) | d <sub>π</sub> (Ru) + π <sub>L2</sub> → π* <sub>bpy</sub> + π* <sub>L2</sub><br>d <sub>π</sub> (Ru) + π <sub>L2</sub> → π* <sub>bpy</sub> + π* <sub>L2</sub><br>d <sub>π</sub> (Ru) + π <sub>L2</sub> → π* <sub>bpy</sub> + π* <sub>L2</sub> | <sup>1</sup> MLCT/ <sup>1</sup> LLCT/ <sup>1</sup> LC<br><sup>1</sup> MLCT/ <sup>1</sup> LLCT/ <sup>1</sup> LC<br><sup>1</sup> MLCT/ <sup>1</sup> LLCT/ <sup>1</sup> LC |
|                                        | T <sub>1</sub> | 2.39; 518 / ----   | H→L+1 (52)<br>H→L+2 (43)             | d <sub>π</sub> (Ru) + π <sub>L2</sub> → π* <sub>bpy</sub> + π* <sub>L2</sub><br>d <sub>π</sub> (Ru) + π <sub>L2</sub> → π* <sub>bpy</sub> + π* <sub>L2</sub>                                                                                 | <sup>3</sup> MLCT/ <sup>3</sup> LLCT/ <sup>3</sup> LC<br><sup>3</sup> MLCT/ <sup>3</sup> LLCT/ <sup>3</sup> LC                                                          |
|                                        | T <sub>2</sub> | 2.47; 502 / ----   | H→L+1 (47)<br>H→L+2 (47)             | d <sub>π</sub> (Ru) + π <sub>L2</sub> → π* <sub>bpy</sub> + π* <sub>L2</sub><br>d <sub>π</sub> (Ru) + π <sub>L2</sub> → π* <sub>bpy</sub> + π* <sub>L2</sub>                                                                                 | <sup>3</sup> MLCT/ <sup>3</sup> LLCT/ <sup>3</sup> LC<br><sup>3</sup> MLCT/ <sup>3</sup> LLCT/ <sup>3</sup> LC                                                          |
|                                        | T <sub>3</sub> | 2.51; 494 / ----   | H→L (79)                             | d <sub>π</sub> (Ru) + π <sub>L2</sub> → π* <sub>bpy</sub> + π* <sub>L2</sub>                                                                                                                                                                 | <sup>3</sup> MLCT/ <sup>3</sup> LLCT/ <sup>3</sup> LC                                                                                                                   |
| [Ru3]Cl <sub>2</sub>                   | S <sub>1</sub> | 2.62; 473 / 0.0011 | H→L (24)<br>H→L+1 (29)<br>H→L+2 (44) | d <sub>π</sub> (Ru) + π <sub>L3</sub> → π* <sub>bpy</sub> + π* <sub>L3</sub><br>d <sub>π</sub> (Ru) + π <sub>L3</sub> → π* <sub>bpy</sub> + π* <sub>L3</sub><br>d <sub>π</sub> (Ru) + π <sub>L3</sub> → π* <sub>bpy</sub>                    | <sup>1</sup> MLCT/ <sup>1</sup> LLCT/ <sup>1</sup> LC<br><sup>1</sup> MLCT/ <sup>1</sup> LLCT/ <sup>1</sup> LC<br><sup>1</sup> MLCT/ <sup>1</sup> LLCT                  |
|                                        | S <sub>2</sub> | 2.65; 469 / 0.0011 | H→L+1 (60)<br>H→L+2 (27)             | d <sub>π</sub> (Ru) + π <sub>L3</sub> → π* <sub>bpy</sub> + π* <sub>L3</sub><br>d <sub>π</sub> (Ru) + π <sub>L3</sub> → π* <sub>bpy</sub>                                                                                                    | <sup>1</sup> MLCT/ <sup>1</sup> LLCT/ <sup>1</sup> LC<br><sup>1</sup> MLCT/ <sup>1</sup> LLCT                                                                           |
|                                        | S <sub>3</sub> | 2.67; 465 / 0.0061 | H→L (71)<br>H→L+2 (27)               | d <sub>π</sub> (Ru) + π <sub>L3</sub> → π* <sub>bpy</sub> + π* <sub>L3</sub><br>d <sub>π</sub> (Ru) + π <sub>L3</sub> → π* <sub>bpy</sub>                                                                                                    | <sup>1</sup> MLCT/ <sup>1</sup> LLCT/ <sup>1</sup> LC<br><sup>1</sup> MLCT/ <sup>1</sup> LLCT                                                                           |
|                                        | T <sub>1</sub> | 2.37; 522 / ----   | H→L+1 (85)                           | d <sub>π</sub> (Ru) + π <sub>L3</sub> → π* <sub>bpy</sub> + π* <sub>L3</sub>                                                                                                                                                                 | <sup>3</sup> MLCT/ <sup>3</sup> LLCT/ <sup>3</sup> LC                                                                                                                   |
|                                        | T <sub>2</sub> | 2.48; 500 / ----   | H→L+2 (87)                           | d <sub>π</sub> (Ru) + π <sub>L3</sub> → π* <sub>bpy</sub>                                                                                                                                                                                    | <sup>3</sup> MLCT/ <sup>3</sup> LLCT                                                                                                                                    |
|                                        | T <sub>3</sub> | 2.52; 493 / ----   | H→L (71)                             | d <sub>π</sub> (Ru) + π <sub>L3</sub> → π* <sub>bpy</sub> + π* <sub>L3</sub>                                                                                                                                                                 | <sup>3</sup> MLCT/ <sup>3</sup> LLCT/ <sup>3</sup> LC                                                                                                                   |
| [Ru(bpy) <sub>3</sub> ]Cl <sub>2</sub> | S <sub>1</sub> | 2.72; 456 / 0.0000 | H→L+1 (28)<br>H→L+2 (72)             | d <sub>π</sub> (Ru) → π* <sub>bpy</sub><br>d <sub>π</sub> (Ru) → π* <sub>bpy</sub>                                                                                                                                                           | <sup>1</sup> MLCT                                                                                                                                                       |
|                                        | S <sub>2</sub> | 2.72; 456 / 0.0001 | H→L+1 (70)<br>H→L+2 (28)             | d <sub>π</sub> (Ru) → π* <sub>bpy</sub><br>d <sub>π</sub> (Ru) → π* <sub>bpy</sub>                                                                                                                                                           | <sup>1</sup> MLCT                                                                                                                                                       |
|                                        | S <sub>3</sub> | 2.72; 455 / 0.0013 | H→L (100)                            | d <sub>π</sub> (Ru) → π* <sub>bpy</sub>                                                                                                                                                                                                      | <sup>1</sup> MLCT                                                                                                                                                       |
|                                        | T <sub>1</sub> | 2.54; 488 / ----   | H→L+1 (100)                          | d <sub>π</sub> (Ru) → π* <sub>bpy</sub>                                                                                                                                                                                                      | <sup>3</sup> MLCT                                                                                                                                                       |
|                                        | T <sub>2</sub> | 2.54; 488 / ----   | H→L+2 (100)                          | d <sub>π</sub> (Ru) → π* <sub>bpy</sub>                                                                                                                                                                                                      | <sup>3</sup> MLCT                                                                                                                                                       |
|                                        | T <sub>3</sub> | 2.59; 479 / ----   | H→L (95)                             | d <sub>π</sub> (Ru) → π* <sub>bpy</sub>                                                                                                                                                                                                      | <sup>3</sup> MLCT                                                                                                                                                       |

**Table SI3.-** Topologies and energies (eV) of the MOs of three representative Ru(II)-complexes and [Ru(bpy)<sub>3</sub>]Cl<sub>2</sub>

|         | [Ru1]Cl <sub>2</sub>                                                                               | [Ru2]Cl <sub>2</sub>                                                                               | [Ru3]Cl <sub>2</sub>                                                                                | [Ru(bpy) <sub>3</sub> ]Cl <sub>2</sub>                                                               |
|---------|----------------------------------------------------------------------------------------------------|----------------------------------------------------------------------------------------------------|-----------------------------------------------------------------------------------------------------|------------------------------------------------------------------------------------------------------|
| LUMO +2 | 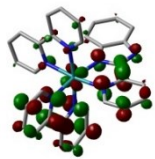<br>-2.45909413   | <br>-2.45283551   | <br>-2.4623595    | <br>-2.47950268   |
| LUMO +1 | <br>-2.46508064   | <br>-2.46372007   | <br>-2.49038724   | <br>-2.4800469    |
| LUMO    | <br>-2.5537898    | <br>-2.54399369   | <br>-2.54943597   | <br>-2.57637526   |
| HOMO    | <br>-6.03439984 | <br>-5.996576   | <br>-6.01535186 | <br>-6.13698682 |
| HOMO -1 | <br>6.1949471   | <br>-6.17181741 | <br>-6.19576344 | <br>-6.30678595 |
| HOMO -2 | <br>6.28392837  | <br>-6.26732942 | <br>-6.27739764 | <br>-6.30733017 |



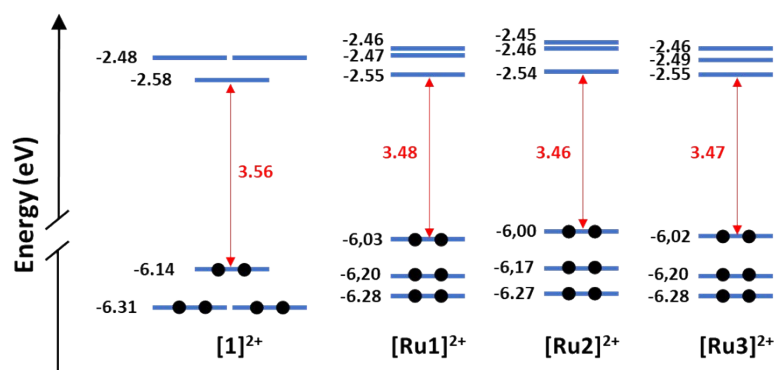

**Fig. SI15.-** Sketch representation showing the energies calculated for the frontier molecular orbitals of  $[1]^{2+}$  and  $[Ru1]^{2+}$ – $[Ru3]^{2+}$ .

## 6. Determination of $^1O_2$ generation quantum yields

Singlet Oxygen quantum yields ( $\phi_{\Delta}^{PC}$ ) were determined for selected Ru(II) photocatalysts (PCs) in acetonitrile according to a relative procedure adapted from the literature,<sup>13</sup> which is based on monitoring by UV-Vis spectroscopy the oxidation of 1,3-diphenylisobenzofuran (DPBF, yellow) to 1,2-dibenzoylbenzene (colorless) photosensitized by the Ru(II) derivatives.

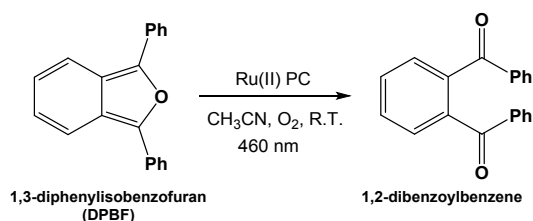

DPBF was selected as the  $^1O_2$  scavenger due to its fast reaction with  $^1O_2$ . Air-equilibrated acetonitrile solutions containing DPBF were prepared ( $\sim 8 \cdot 10^{-5}$  M) in a cuvette and their absorbance adjusted to around 1.0 at 410 nm. Then, the photosensitizer (either Ru-PC or  $[Ru(bpy)_3]Cl_2$ ,  $[1]Cl_2$ ;  $10^{-5}$  M, corresponding to absorbance around 0.2) was introduced in the cuvette. Low dye concentrations were used to minimize quenching of  $^1O_2$  by the dyes. The mixture was irradiated with a blue LED strip ( $\lambda_{irr} = 460$  nm) at room temperature for 1 second irradiation intervals during a total exposure period of 8 seconds and absorption UV-Vis spectra were recorded after every irradiation interval. The decrease in the absorption band at 410 nm was plotted vs. the irradiation time and the experimental data were fitted to a straight line. An acetonitrile solution of DPBF without the Ru(II) complex was examined to confirm its photostability under identical irradiation conditions (8 s). The  $\phi_{\Delta}^{PC}$  were calculated by a relative method using equation (1), and  $[Ru(bpy)_3]Cl_2$  ( $[1]Cl_2$ ) as the reference for  $^1O_2$  photosensitization in acetonitrile ( $\phi_{\Delta}^S = 0.56$ ).<sup>14</sup>

$$\phi_{\Delta}^{PC} = \phi_{\Delta}^S \times (S^{PC} \times F^S) / (S^S \times F^{PC}) \quad \text{eq (1)}$$

<sup>13</sup> a) N. Adarsh, R. R. Avirah and D. Ramaiah, *Org. Lett.*, 2010, **12**, 5720–5723, b) P. Majumdar, X. Yuan, S. Li, B. Le Guennic, J. Ma, C. Zhang, D. Jacquemin and J. Zhao, *J. Mater. Chem. B*, 2014, **2**, 2838–2854, c) S. P.-Y. Li, C. T.-S. Lau, M.-W. Louie, Y.-W. Lam, S. H. Cheng and K. K.-W. Lo, *Biomaterials*, 2013, **34**, 7519–7532.

<sup>14</sup> Y. Lu, R. Conway-Kenny, J. Wang, X. Cui, J. Zhao and S. M. Draper, *Dalt. Trans.*, 2018, **47**, 8585–8589.

Where  $S$ , is the slope of a linear fit for the change in absorbance of DPBF (at 410 nm) with the irradiation time, and  $F$ , is the absorption correction factor, which is given by  $F = 1 - 10^{-OD}$  (where  $OD$  is the optical density at the irradiation wavelength). The superscripts PC and S stand for the Ru(II) photocatalysts and the standard sensitizer, **[1]Cl<sub>2</sub>**, respectively.

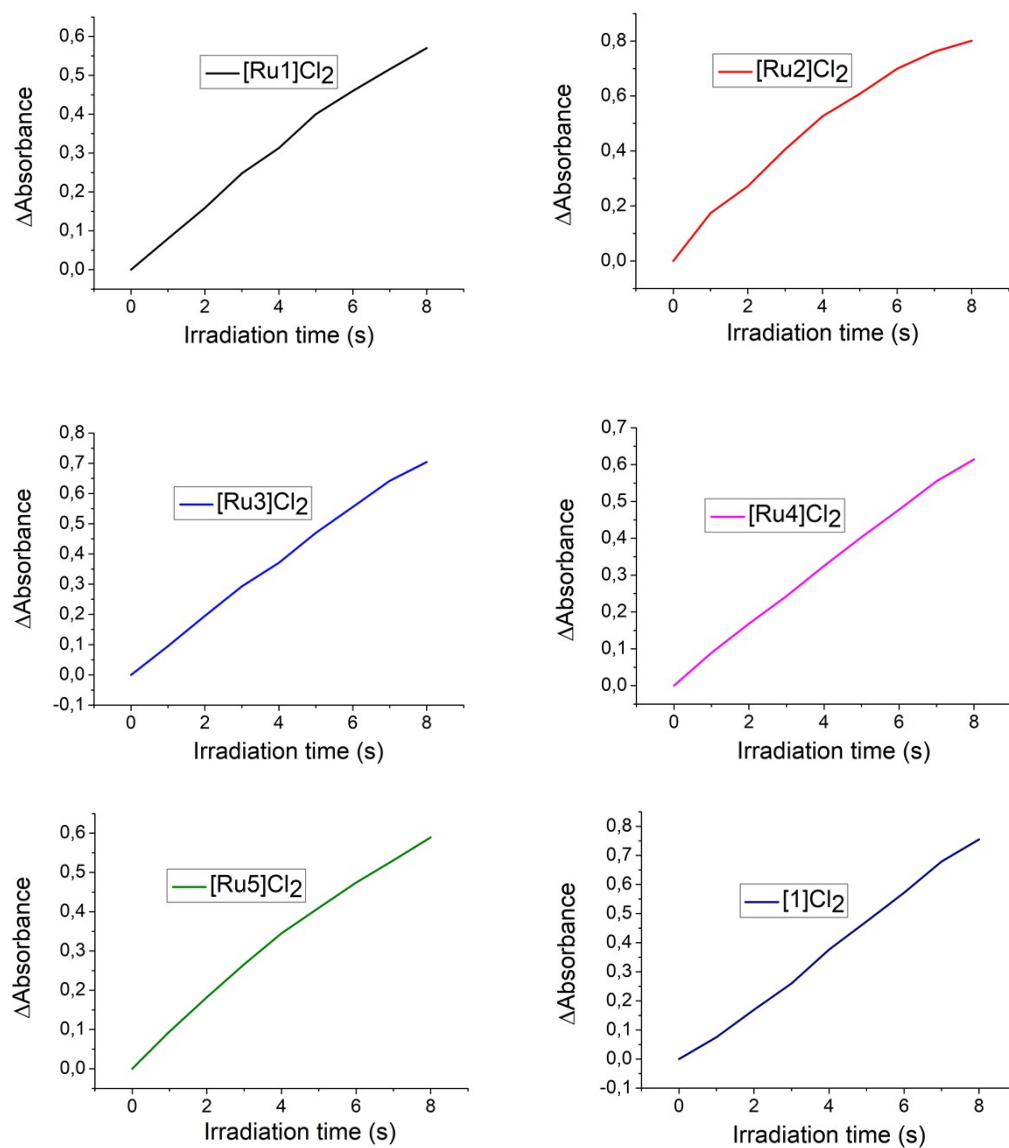

**Figure S116.** Graphics obtained from the experimental data and used for the determination of  $^1O_2$  generation quantum yields.

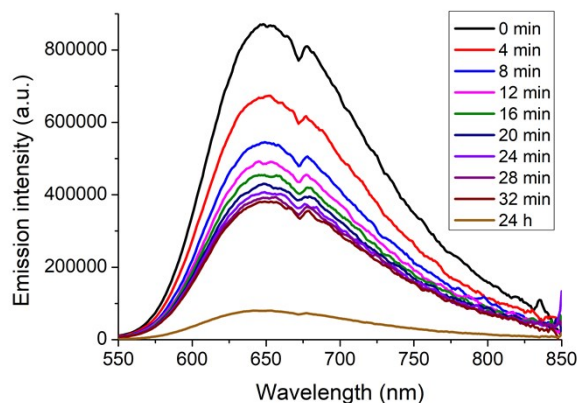

**Figure S117.** Effect of the oxygen on the emission of  $[\text{Ru}_3]\text{Cl}_2$  with the time.

### 7. Electrochemical measurements and individual CV of the Ru(II) complexes.

Electrochemical measurements were performed using a portable potentiostat/galvanostat PalmSens3 (PalmSens) equipment controlled by the software PStTrace4 Version 4.4.2. All experiments were carried out using a three-electrode cell with a glassy carbon-disc (diameter = 3 mm) as the working electrode, a platinum-wire as the auxiliary electrode, and a Ag/AgCl (MF-2052 BASi) reference electrode separated from the bulk solution by a Vycor™ frit. Oxygen was removed from the solution by bubbling argon for 5 minutes and keeping the current of argon along the whole experiment. The measurements were recorded for acetonitrile solutions of the Ru(II) complexes ( $5 \times 10^{-4}$  M) in the presence of  $[\text{nBu}_4\text{N}][\text{PF}_6]$  (0.1 M) as the supporting electrolyte by cyclic voltammetry (CV) at a scan rate of  $100 \text{ mV s}^{-1}$  in a clockwise direction. Ferrocene was added at the end of all the experiments as the internal reference in order to refer the potentials to the redox pair ferrocenium/ferrocene ( $\text{Fc}^+/\text{Fc}$ ) under the conditions of our experiments. The potential experimentally determined for the redox couple  $\text{Fc}^+/\text{Fc}$  was  $E^{\circ}_{1/2} = 0.443 \pm 0.005 \text{ V vs. Ag/AgCl}$ . Therefore, the experimental redox potentials were calculated from the corresponding voltammograms as:

$E^{\circ} (\text{vs AgCl/Ag}) = (E_{\text{ap}} + E_{\text{cp}})/2$ , for reversible peaks where  $E_{\text{ap}}$  and  $E_{\text{cp}}$  stand for anodic and cathodic peak potentials, respectively. However, for irreversible peaks, the potentials were calculated as either the  $E_{\text{ap}}$  maximum or  $E_{\text{cp}}$  minimum.

$E^{\circ} (\text{vs Fc}^+/\text{Fc}) = E^{\circ} (\text{vs AgCl/Ag}) - 0.443$ , for potential values reported in reference to the ( $\text{Fc}^+/\text{Fc}$ ) redox couple.

$E^{\circ} (\text{vs SCE}) = E^{\circ} (\text{vs Fc}^+/\text{Fc}) + 0.404$ , for potential values reported in reference to the saturated calomel electrode (SCE) and having into account that  $E^{\circ}_{1/2} (\text{Fc}^+/\text{Fc}) = 0.404 \text{ V vs SCE}$  according to the literature.<sup>15</sup>

<sup>15</sup> Connolly, N. G.; Geiger, W. E. *Chem. Rev.* **1996**, *96*, 877–910

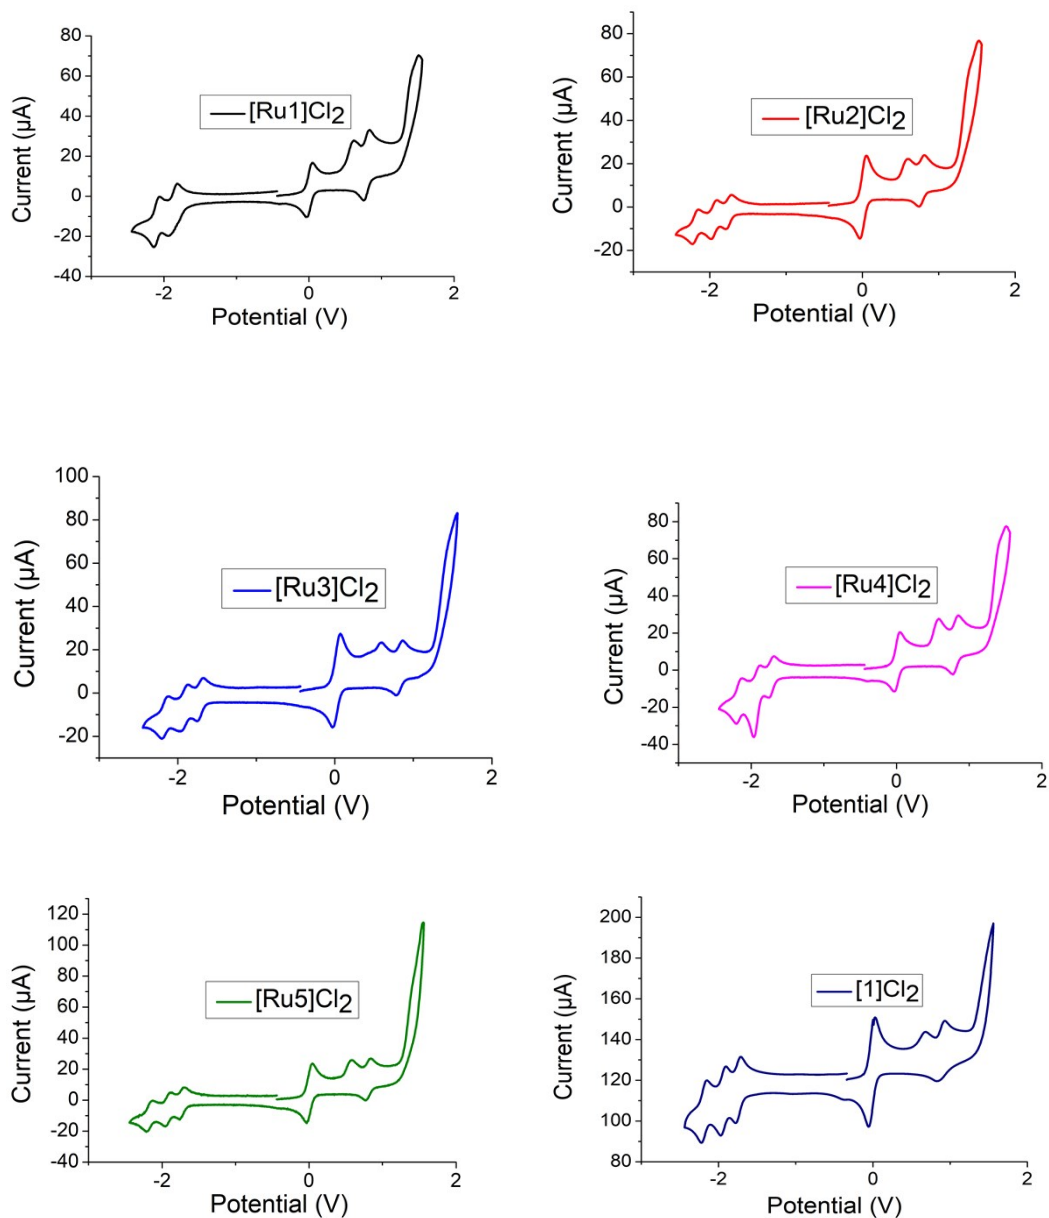

**Figure S118.** Cyclic voltammograms of the ruthenium complexes.

**Table SI4.** Redox Potentials for the excited states versus Fc<sup>+</sup>/Fc.<sup>a</sup>

| Complex                            | E°(Ru <sup>III</sup> /Ru <sup>II</sup> ) | E°(Ru <sup>II</sup> /Ru <sup>I</sup> ) | E°(Ru <sup>II*</sup> /Ru <sup>II</sup> ) | E°(Ru <sup>III</sup> /Ru <sup>II*</sup> ) | E°(Ru <sup>II*</sup> /Ru <sup>I</sup> ) |
|------------------------------------|------------------------------------------|----------------------------------------|------------------------------------------|-------------------------------------------|-----------------------------------------|
| [1](PF <sub>6</sub> ) <sub>2</sub> | +0.89                                    | -1.73                                  | 2.00 eV (621 nm)                         | -1.11                                     | +0.27                                   |
| [Ru1]Cl <sub>2</sub>               | +0.80                                    | -1.87                                  | +1.91 (649 nm)                           | -1.11                                     | +0.04                                   |
| [Ru2]Cl <sub>2</sub>               | +0.78                                    | -1.75                                  | +1.92 (647 nm)                           | -1.14                                     | +0.17                                   |
| [Ru3]Cl <sub>2</sub>               | +0.83                                    | -1.72                                  | +1.89 (656 nm)                           | -1.06                                     | +0.17                                   |
| [Ru4]Cl <sub>2</sub>               | +0.81                                    | -1.72                                  | +1.89 (657 nm)                           | -1.08                                     | +0.17                                   |
| [Ru5]Cl <sub>2</sub>               | +0.80                                    | -1.74                                  | +1.91 (650 nm)                           | -1.11                                     | +0.17                                   |

<sup>a</sup>All potential are given in volts versus Fc<sup>+</sup>/Fc. E°(Ru<sup>III</sup>/Ru<sup>II\*</sup>) = E°(Ru<sup>III</sup>/Ru<sup>II</sup>) - E°(Ru<sup>II\*</sup>/Ru<sup>II</sup>) and E°(Ru<sup>II\*</sup>/Ru<sup>I</sup>) = E°(Ru<sup>II</sup>/Ru<sup>I</sup>) + E°(Ru<sup>II\*</sup>/Ru<sup>II</sup>).

## 8.- Procedure for the photocatalytic oxidation of amines

In a septum-capped test tube the amine (5  $\mu\text{mol}$  in solution of  $\text{CH}_3\text{CN}$ ), the PC (Photocatalyst = 0.05 or 0.005  $\mu\text{mol}$  in solution of  $\text{CH}_3\text{CN}$ ), and additional  $\text{CH}_3\text{CN}$  to provide the desired final concentration of substrate (10 mM in 0.5 mL), were added. The system was purged with  $\text{O}_2$  or  $\text{N}_2$  until atmosphere saturation and irradiated with Blue LED light ( $\lambda = 460 \text{ nm}$ , 24W) at room temperature during the required time. Then, an aliquot (100  $\mu\text{L}$ ) of the reaction mixture was diluted in  $\text{CD}_3\text{CN}$  (400  $\mu\text{L}$ ) and the mixture was analysed by  $^1\text{H}$  NMR to determine the conversion. The yield values for the imines were calculated from the integration of the peaks assigned to the methylene groups of both the imine product (e.g.: doublet at 4.75 ppm for  $\text{Ph-CH}_2\text{-N=CH-Ph}$ , **2a**) and the benzyl amine used as reactant (e.g.: singlet at 3.78 ppm for  $\text{Ph-CH}_2\text{-NH}_2$ , **1a**).

**Table S16.** Substrate Scope for the photooxidation of primary and secondary amines <sup>a</sup>

$$2 \text{ R-CH}_2\text{-NH}_2 + \text{O}_2 \xrightarrow[\text{CH}_3\text{CN, RT, } \lambda = 460 \text{ nm}]{[\text{Ru3}]\text{Cl}_2 \text{ (1 mol \%)}} \text{R-CH=N-CH-R}$$

1x (1 atm)  2x

| Entry | Substrate                                                                           | Product                                                                              | Yield (%) [Time (min)]         |
|-------|-------------------------------------------------------------------------------------|--------------------------------------------------------------------------------------|--------------------------------|
| 1     | 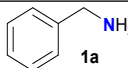   |     | 98 [15]<br>>99 [30]            |
| 2     |    |    | 99 [30]                        |
| 3     |   |    | 86 [30]<br>>99 [60]            |
| 4     |  |   | 87 [30]<br>95 [60]<br>>99 [90] |
| 5     |  |   | >99 [30]                       |
| 6     |  |   | 62 [30]<br>89 [60]<br>>99 [90] |
| 7     |  |   | >99 [30]                       |
| 8     |  |  | >99 [30]                       |
| 9     |  |   | >99 [30]                       |
| 10    |  |   | 94 [30]<br>>99 [60]            |
| 11    |  |   | >99 [30]                       |

<sup>a</sup>Reaction Conditions: amine (10 mM),  $[\text{Ru3}]\text{Cl}_2$  (1 mol %), acetonitrile (0.5 mL),  $\text{O}_2$  (balloon, 1 atm), blue LED light ( $\lambda = 460 \text{ nm}$ ), room temperature for the above-mentioned time. The yields were experimentally determined from  $^1\text{H}$  NMR integration of the corresponding reaction crudes (see Supporting information). Reactions time between brackets.

## 9.- General One-pot procedure of photocatalyzed oxidative cyanation of amines

In a septum-capped glass test tube the amine **1a** (5  $\mu\text{mol}$  in solution of  $\text{CH}_3\text{CN}$ ), the **PC** (Photocatalyst = 0.05  $\mu\text{mol}$  in solution of  $\text{CH}_3\text{CN}$ ), **TMSCN** (10  $\mu\text{mol}$  in solution of  $\text{CH}_3\text{CN}$ , 2 equiv.) and additional  $\text{CH}_3\text{CN}$  to provide the desired final concentration of substrate (10 mM in 0.5 mL) were placed. The system was purged with  $\text{O}_2$  until atmosphere saturation and stirred under irradiation with Blue LED light ( $\lambda = 460 \text{ nm}$ , 24W) at room temperature during the required time for the formation of the imine (30 min) and then under ambient light during the additional time required for the formation of the  $\alpha$ -amino nitrile (5 h and a half for **1a**). Then, an aliquot (100  $\mu\text{L}$ ) of the reaction mixture was diluted in  $\text{CD}_3\text{CN}$  (400  $\mu\text{L}$ ) and the mixture was analysed by  $^1\text{H}$  NMR to determine the yield of **3a**. The yield values for the  $\alpha$ -amino nitriles were calculated from the integration of the peaks assigned to the methylene group of the  $\alpha$ -amino nitrile product (e.g.: multiplet at 3.85 ppm for  $\text{Ph-CH}_2\text{-NH-CH(CN)-Ph}$ , **3a**) and the methylene group of the imine (e.g.: doublet at 4.75 ppm for  $\text{Ph-CH}_2\text{-N=CH-Ph}$ , **2a**).

For the isolation of the  $\alpha$ -amino nitrile products the procedure was adapted according to the following amounts:

In a septum-capped glass test tube the amine **1a** (100  $\mu\text{mol}$  in solution of  $\text{CH}_3\text{CN}$ ), the **PC** (Photocatalyst = 1  $\mu\text{mol}$  in solution of  $\text{CH}_3\text{CN}$ ), **TMSCN** (200  $\mu\text{mol}$  in solution of  $\text{CH}_3\text{CN}$ , 2 equiv.) and additional  $\text{CH}_3\text{CN}$  to provide the desired final concentration of substrate (20 mM in 5 mL) were placed. The system was purged with  $\text{O}_2$  until atmosphere saturation and stirred under irradiation with Blue LED light ( $\lambda = 460 \text{ nm}$ , 24W) at room temperature during the required time for the formation of the imine (30 min) and then under ambient light during the additional time required for the formation of the  $\alpha$ -amino nitrile (5 h and a half for **1a**). Then, an aliquot (100  $\mu\text{L}$ ) of the reaction mixture was diluted in  $\text{CD}_3\text{CN}$  (400  $\mu\text{L}$ ) and the mixture was analysed by  $^1\text{H}$  NMR to determine the yield of **3a**. The yield values for the  $\alpha$ -amino nitriles were calculated from the integration of the peaks assigned to the methylene group of the  $\alpha$ -amino nitrile product (e.g.: multiplet at 3.85 ppm for  $\text{Ph-CH}_2\text{-NH-CH(CN)-Ph}$ , **3a**) and the methylene group of the imine (e.g.: doublet at 4.75 ppm for  $\text{Ph-CH}_2\text{-N=CH-Ph}$ , **2a**). The products were isolated filtering the crude solution through a silica pad, using acetonitrile like mobile phase and at the end two millilitres of dichloromethane to assure the complete filtration of the product of interest. Then the products were dried under vacuum to constant weight. The  $^1\text{H}$  NMR was recorded in  $\text{CDCl}_3$ .

## 10- Screening of different cyanide reagents with $[\text{Ru3}]\text{Cl}_2$ as PC.

Table S15.

| Substrate | Catalyst (mol %) | Solvent                      | Cyanide                                            | Time (irradiation+stirring) | Conversion (%)                                 |
|-----------|------------------|------------------------------|----------------------------------------------------|-----------------------------|------------------------------------------------|
| <b>1a</b> | 1                | AcCN:H <sub>2</sub> O (98:2) | 2 (KCN)                                            | 0,5 + 5,5                   | <b>1a</b> -71<br><b>2a</b> -7<br><b>3a</b> -22 |
|           | 1                | AcCN:H <sub>2</sub> O (98:2) | 2 ( $\text{K}_3\text{Fe(CN)}_6$ )                  | 0,5 + 5,5                   | <b>2a</b> -100                                 |
|           | 1                | AcCN:H <sub>2</sub> O (98:2) | 2 ( $\text{K}_4\text{Fe(CN)}_6$ 3H <sub>2</sub> O) | 0,5 + 5,5                   | <b>1a</b> -75<br><b>2a</b> -25                 |

## 11.- $^1\text{H}$ NMR spectra and characterization of the crude and isolated $\alpha$ -amino nitriles

### 3a: 2-(benzylamino)-2-phenylacetonitrile

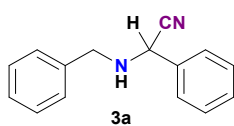

$^1\text{H}$  NMR of crude **3a** (400 MHz,  $\text{CD}_3\text{CN}$ , 25 °C):  $\delta$  7.58 – 7.53 (m, 2H), 7.46 – 7.28 (m, 8H), 4.77 (d,  $^3J_{\text{H-H}} = 9.38$  Hz, 1H, -CH(CN)), 3.91 (dd,  $^2J_{\text{H-H}} = 13.5$  Hz,  $^3J_{\text{H-H}} = 6.94$  Hz, 1H, -CH<sub>2</sub>) 3.82 (dd,  $^2J_{\text{H-H}} = 13.5$  Hz,  $^3J_{\text{H-H}} = 6.94$  Hz, 1H, -CH<sub>2</sub>) ppm.  $^1\text{H}$  NMR of isolated **3a** (400 MHz,  $\text{CDCl}_3$ , 25 °C)  $\delta$  7.58 – 7.53 (m, 2H), 7.46 – 7.28 (m, 8H), 4.77 (s, 1H), 4.06 (d,  $^2J_{\text{H-H}} = 12.9$  Hz, 1H, -CH<sub>2</sub>), 3.95 (d,  $^2J_{\text{H-H}} = 12.9$  Hz, 1H, -CH<sub>2</sub>), ppm. HR ESI+ MS ( $\text{CH}_2\text{Cl}_2$ ):  $[\text{M}+\text{H}^+]$  calcd. for  $[\text{C}_{15}\text{H}_{15}\text{N}_2]^+$  223.1235, found 223.1234. Note: In  $\text{CD}_3\text{CN}$  the diastereotopic -CH<sub>2</sub>- and the -CH(CN)- protons are coupled to the NH, whereas in  $\text{CDCl}_3$  these couplings are not observed.

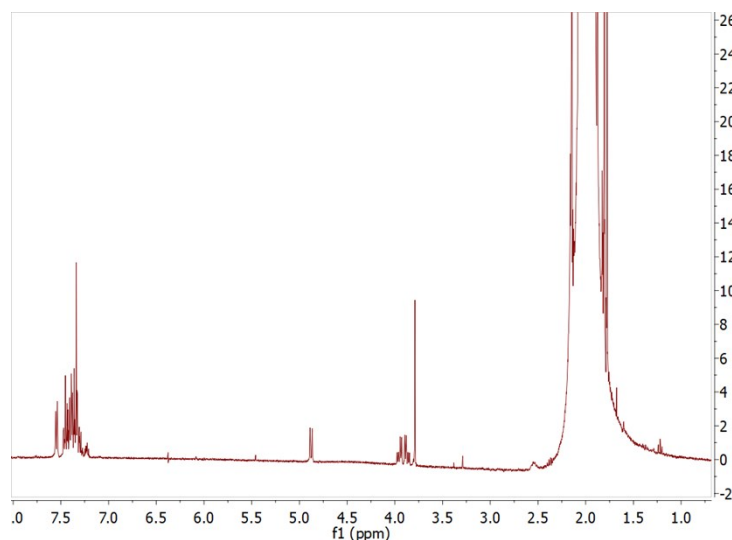

**Figure SI19.**  $^1\text{H}$  NMR spectrum in  $\text{CD}_3\text{CN}$  for the crude **3a** of the photocatalytic oxidative cyanation of amine (**1a**, 20 mM) in the presence of the photocatalyst  $[\text{Ru3}]\text{Cl}_2$  (1 mol%) in  $\text{CH}_3\text{CN}$  under  $\text{O}_2$  and blue LED irradiation ( $\lambda_{\text{exc}} = 460$  nm) at room temperature.

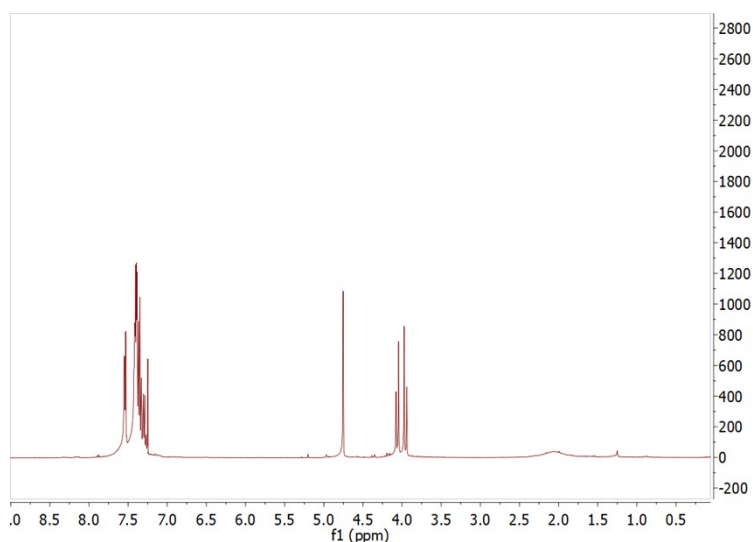

**Figure SI20.**  $^1\text{H}$  NMR spectrum in  $\text{CDCl}_3$  for the isolated cyanide **3a** of the photocatalytic oxidative cyanation of amine (**1a**, 20 mM) in the presence of the photocatalyst  $[\text{Ru3}]\text{Cl}_2$  (1 mol%) in  $\text{CH}_3\text{CN}$  under  $\text{O}_2$  and blue LED irradiation ( $\lambda_{\text{exc}} = 460$  nm) at room temperature.

**3b: 2-((4-methoxybenzyl)amino)-2-(4-methoxyphenyl)acetonitrile**

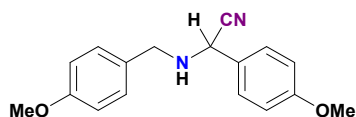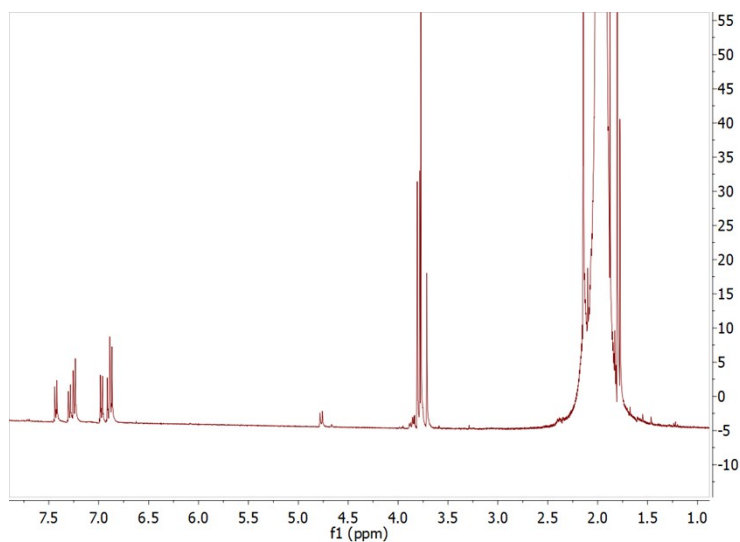

**Figure SI21.**  $^1\text{H}$  NMR spectrum in  $\text{CD}_3\text{CN}$  for the crude **3b** of the photocatalytic oxidative cyanation of amine (**1b**, 20 mM) in the presence of the photocatalyst  $[\text{Ru}3]\text{Cl}_2$  (1 mol%) in  $\text{CH}_3\text{CN}$  under  $\text{O}_2$  and blue LED irradiation ( $\lambda_{\text{exc}} = 460$  nm) at room temperature.

**3c: 2-((4-fluorobenzyl)amino)-2-(4-fluorophenyl)acetonitrile**

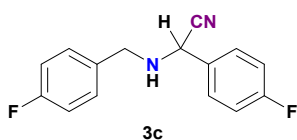

$^1\text{H}$  NMR (isolated) (400 MHz,  $\text{CDCl}_3$ , 25 °C)  $\delta$  7.59 – 7.47 (m, 2H), 7.40 – 7.31 (m, 2H), 7.21 – 7.09 (m, 2H), 7.09 – 6.99 (m, 2H), 4.83 (d,  $J = 9.7$  Hz, 1H), 4.01 (d,  $J = 13.05$  Hz, 1H,  $\text{CH}_2$ ), 3.90 (d,  $J = 13.05$  Hz, 1H,  $\text{CH}_2$ ) ppm. HR ESI+ MS ( $\text{CH}_2\text{Cl}_2$ , 4:1):  $[\text{M}+\text{H}^+]$  calcd. for  $[\text{C}_{15}\text{H}_{13}\text{F}_2\text{N}_2]^+$  259.1047, found 259.1047

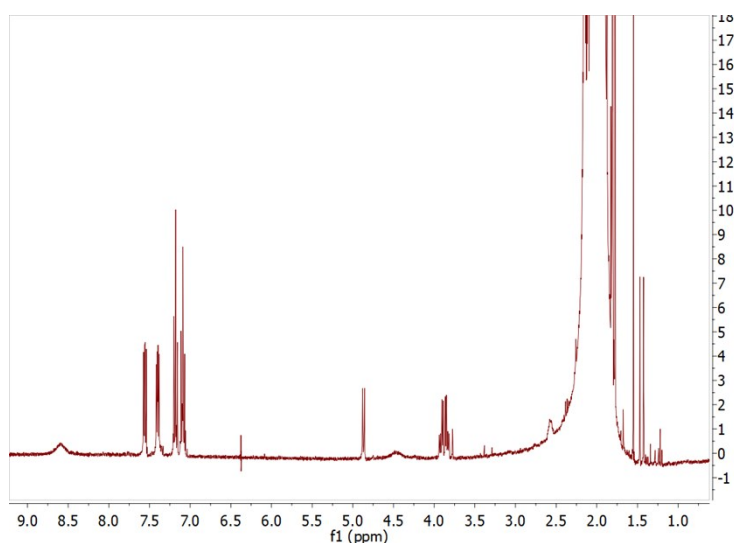

**Figure SI22.**  $^1\text{H}$  NMR spectrum in  $\text{CD}_3\text{CN}$  for the crude **3c** of the photocatalytic oxidative cyanation of amine (**1c**, 20 mM) in the presence of the photocatalyst  $[\text{Ru}3]\text{Cl}_2$  (1 mol%) in  $\text{CH}_3\text{CN}$  under  $\text{O}_2$  and blue LED irradiation ( $\lambda_{\text{exc}} = 460$  nm) at room temperature.



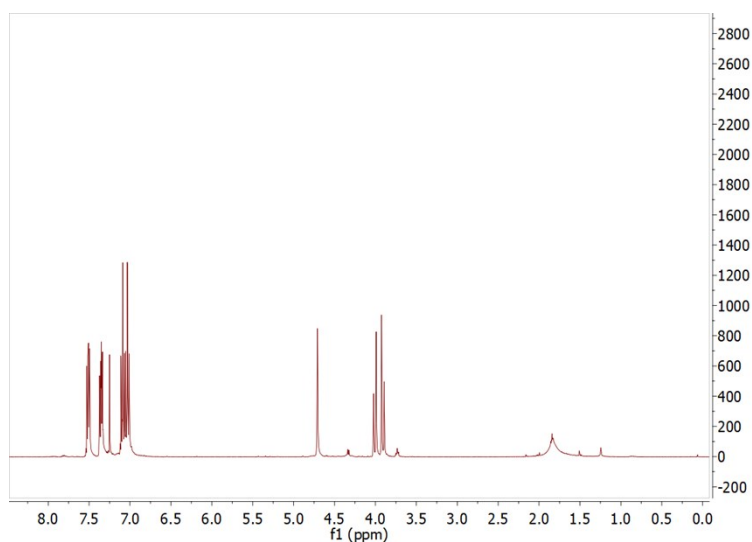

**Figure SI23.**  $^1\text{H}$  NMR spectrum in  $\text{CDCl}_3$  for the isolate cyanide **3c** of the photocatalytic oxidative cyanation of amine (**1c**, 20 mM) in the presence of the photocatalyst  $[\text{Ru3}]\text{Cl}_2$  (1 mol%) in  $\text{CH}_3\text{CN}$  under  $\text{O}_2$  and blue LED irradiation ( $\lambda_{\text{exc}} = 460 \text{ nm}$ ) at room temperature.

**3f: 2-(benzo[d][1,3]dioxol-5-yl)-2-((benzo[d][1,3]dioxol-5-ylmethyl)amino)acetonitrile**

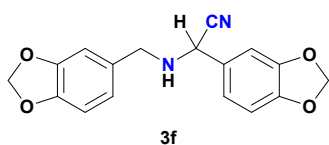

$^1\text{H}$  NMR (isolated) (400 MHz,  $\text{CDCl}_3$ , 25 °C)  $\delta$  6.99 (m, 1H), 6.80 (m, 3H), 5.95 (m, 3H), 4.64 (s, 1H), 3.93 (d,  $J = 13.3 \text{ Hz}$ , 1H,  $\text{CH}_2$ ), 3.82 (d,  $J = 13.3 \text{ Hz}$ , 1H,  $\text{CH}_2$ ), 1.54 (m, 4H) ppm.

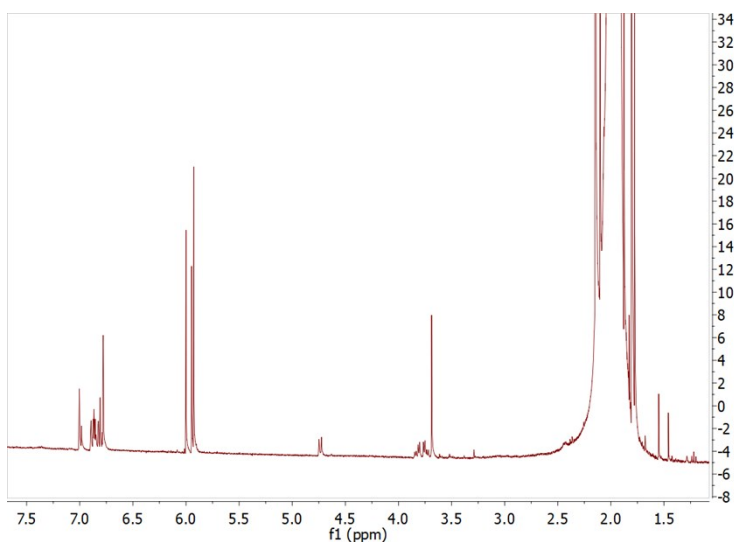

**Figure SI24.**  $^1\text{H}$  NMR spectrum in  $\text{CD}_3\text{CN}$  for the crude **3f** of the photocatalytic oxidative cyanation of amine (**1f**, 20 mM) in the presence of the photocatalyst  $[\text{Ru3}]\text{Cl}_2$  (1 mol%) in  $\text{CH}_3\text{CN}$  under  $\text{O}_2$  and blue LED irradiation ( $\lambda_{\text{exc}} = 460 \text{ nm}$ ) at room temperature.

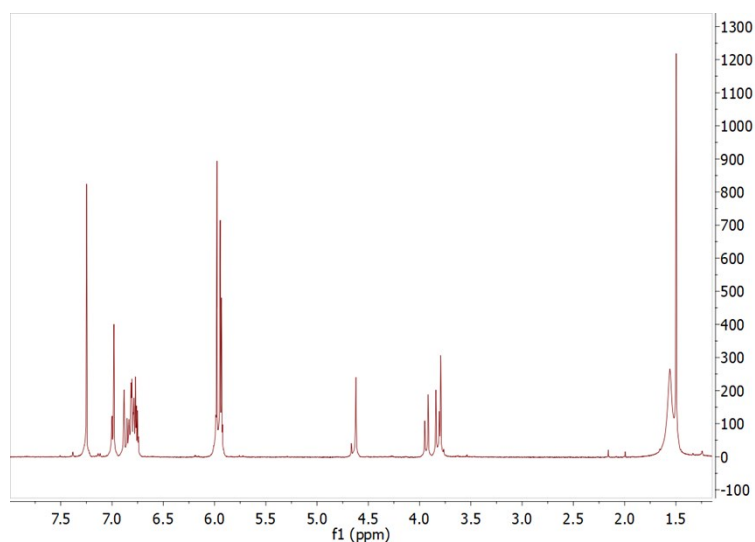

**Figure SI25.**  $^1\text{H}$  NMR spectrum in  $\text{CDCl}_3$  for the isolate cyanide **3f** of the photocatalytic oxidative cyanation of amine (**1f**, 20 mM) in the presence of the photocatalyst  $[\text{Ru3}]\text{Cl}_2$  (1 mol%) in  $\text{CH}_3\text{CN}$  under  $\text{O}_2$  and blue LED irradiation ( $\lambda_{\text{exc}} = 460 \text{ nm}$ ) at room temperature.

**3a: 2-(benzylamino)-2-phenylacetonitrile**

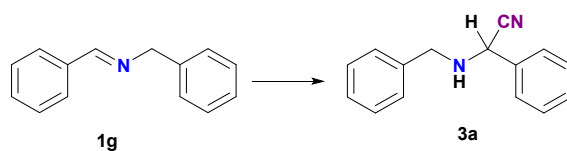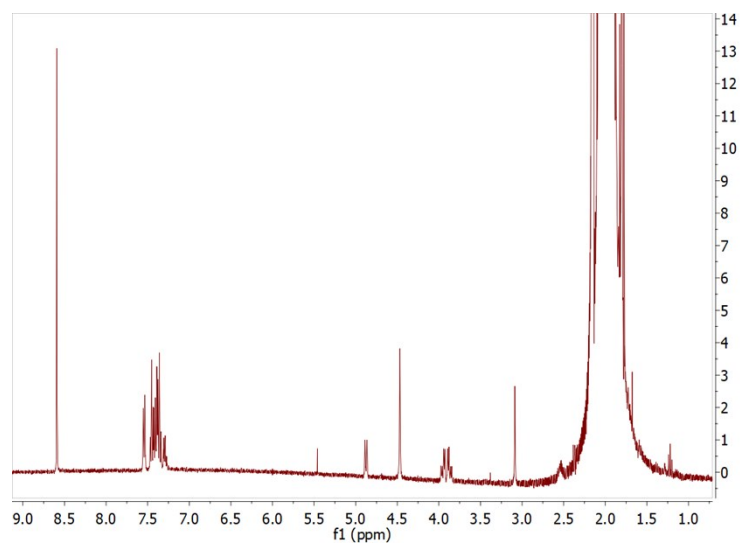

**Figure SI26.**  $^1\text{H}$  NMR spectrum in  $\text{CD}_3\text{CN}$  for the crude **3a** of the photocatalytic oxidative cyanation of amine (**1g**, 20 mM) in the presence of the photocatalyst  $[\text{Ru3}]\text{Cl}_2$  (1 mol%) in  $\text{CH}_3\text{CN}$  under  $\text{O}_2$  and blue LED irradiation ( $\lambda_{\text{exc}} = 460 \text{ nm}$ ) at room temperature

**3h: 2-(hexylamino)heptanenitrile**

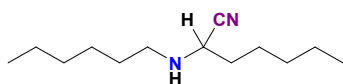

$^1\text{H NMR}$  (400 MHz,  $\text{CDCl}_3$ , 25 °C)  $\delta$  3.50 (t,  $J = 7.1$  Hz, 1H), 2.91 – 2.80 (m, 1H), 2.60 (ddd,  $J = 11.0, 8.0, 6.2$  Hz, 1H), 1.73 (p,  $J = 7.3, 6.8$  Hz, 2H), 1.58 – 1.40 (m, 4H), 1.40 – 1.20 (m, 10H), 1.07 (s, 1H), 0.95 – 0.80 (m, 6H) ppm. HR ESI+ MS ( $\text{CH}_2\text{Cl}_2$  4:1):  $[\text{M}+\text{H}^+]$  calcd. for  $[\text{C}_{13}\text{H}_{27}\text{N}_2]^+$  211.2174, found 211.2173.

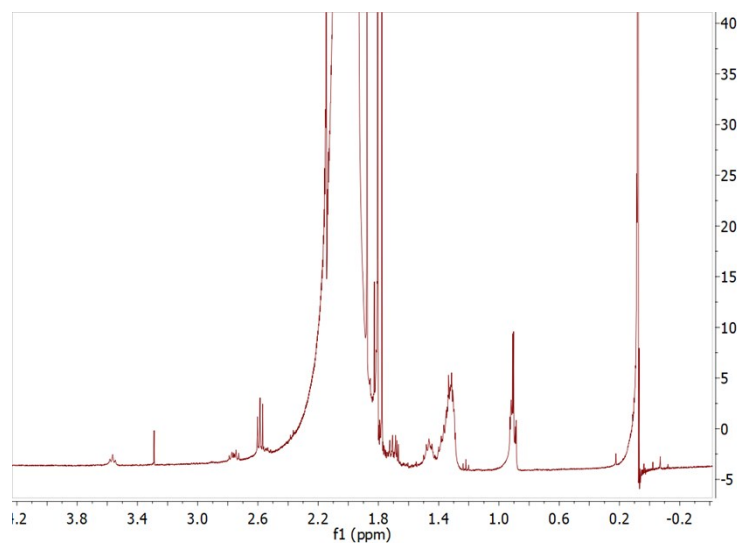

**Figure SI27.**  $^1\text{H NMR}$  spectrum in  $\text{CD}_3\text{CN}$  for the crude **3h** of the photocatalytic oxidative cyanation of amine (**1h**, 20 mM) in the presence of the photocatalyst  $[\text{Ru3}]\text{Cl}_2$  (1 mol%) in  $\text{CH}_3\text{CN}$  under  $\text{O}_2$  and blue LED irradiation ( $\lambda_{\text{exc}} = 460$  nm) at room temperature.

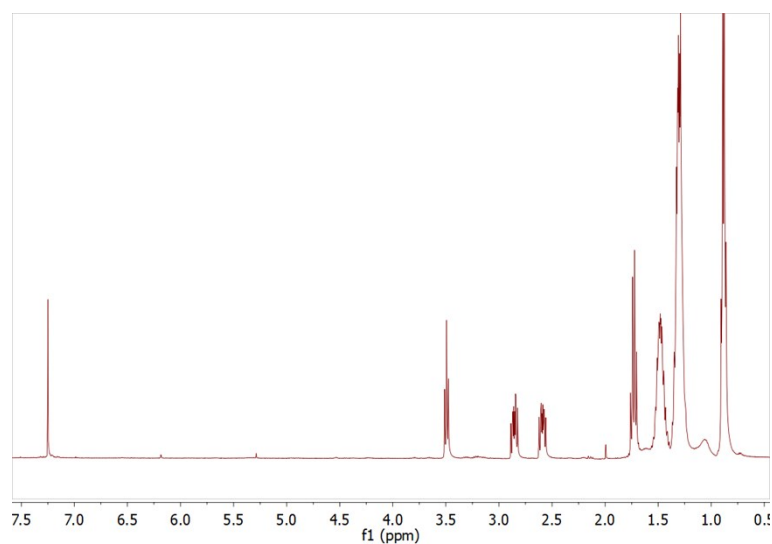

**Figure SI28.**  $^1\text{H NMR}$  spectrum in  $\text{CDCl}_3$  for the isolate cyanide **3h** of the photocatalytic oxidative cyanation of amine (**1h**, 20 mM) in the presence of the photocatalyst  $[\text{Ru3}]\text{Cl}_2$  (1 mol%) in  $\text{CH}_3\text{CN}$  under  $\text{O}_2$  and blue LED irradiation ( $\lambda_{\text{exc}} = 460$  nm) at room temperature.

**3i: 1,2,3,4-tetrahydroisoquinoline-1-carbonitrile**

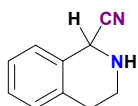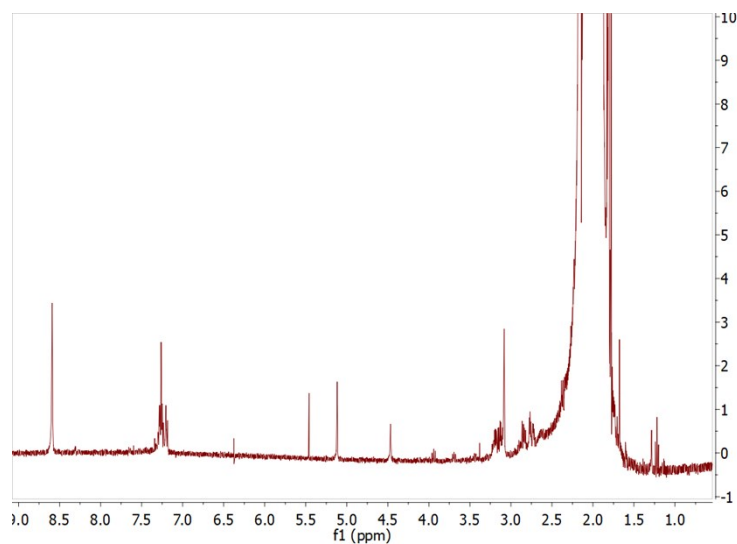

**Figure S129.**  $^1\text{H}$  NMR spectrum in  $\text{CD}_3\text{CN}$  for the crude **3i** of the photocatalytic oxidative cyanation of amine (**1i**, 20 mM) in the presence of the photocatalyst  $[\text{Ru}3]\text{Cl}_2$  (1 mol%) in  $\text{CH}_3\text{CN}$  under  $\text{O}_2$  and blue LED irradiation ( $\lambda_{\text{exc}} = 460$  nm) at room temperature

**3j: 2-(thiophen-2-yl)-2-((thiophen-2-ylmethyl)amino)acetonitrile**

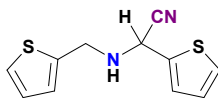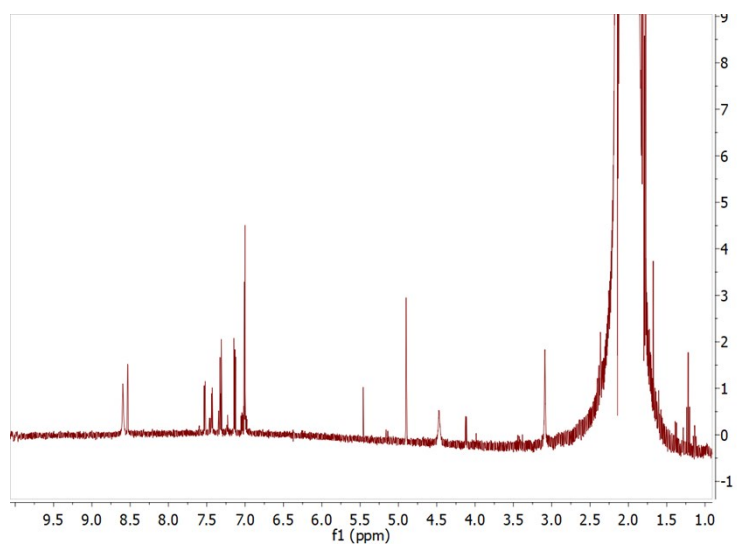

**Figure S130.**  $^1\text{H}$  NMR spectrum in  $\text{CD}_3\text{CN}$  for the crude **3j** of the photocatalytic oxidative cyanation of amine (**1j**, 10 mM) in the presence of the photocatalyst  $[\text{Ru}3]\text{Cl}_2$  (1 mol%) in  $\text{CH}_3\text{CN}$  under  $\text{O}_2$  and blue LED irradiation ( $\lambda_{\text{exc}} = 460$  nm) at room temperature.

**3k: 2-((2-methylbenzyl)amino)-2-(o-tolyl)acetonitrile**

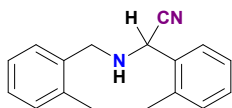

$^1\text{H NMR}$  (400 MHz,  $\text{CDCl}_3$ , 25 °C)  $\delta$  7.63 – 7.55 (m, 1H), 7.33 (d,  $J = 7.1$  Hz, 1H), 7.30 – 7.22 (m, 2H), 7.22 – 7.14 (m, 4H), 4.83 (d,  $J = 8.9$  Hz, 1H), 4.08 (d,  $J = 13.6$  Hz, 1H,  $\text{CH}_2$ ), 3.94 (d,  $J = 13.6$  Hz, 1H,  $\text{CH}_2$ ), 2.38 (s, 3H), 2.29 (s, 3H) ppm.

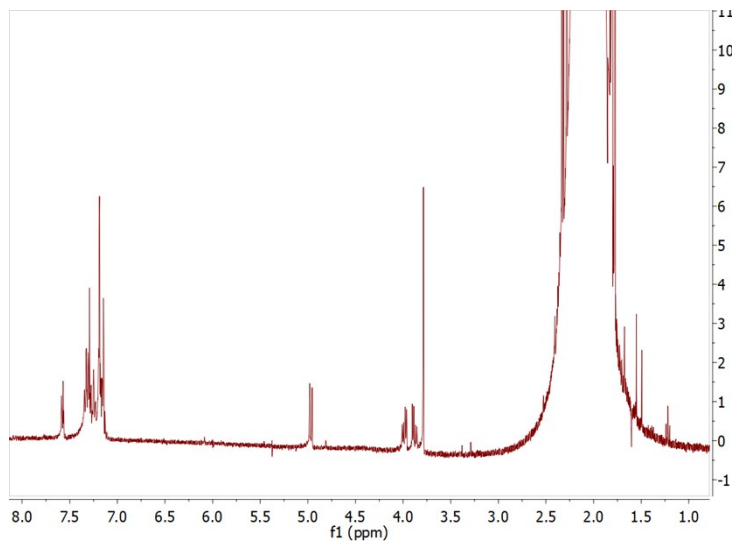

**Figure SI31.**  $^1\text{H NMR}$  spectrum in  $\text{CD}_3\text{CN}$  for the crude **3k** of the photocatalytic oxidative cyanation of amine (**1k**, 20 mM) in the presence of the photocatalyst  $[\text{Ru}3]\text{Cl}_2$  (1 mol%) in  $\text{CH}_3\text{CN}$  under  $\text{O}_2$  and blue LED irradiation ( $\lambda_{\text{exc}} = 460$  nm) at room temperature

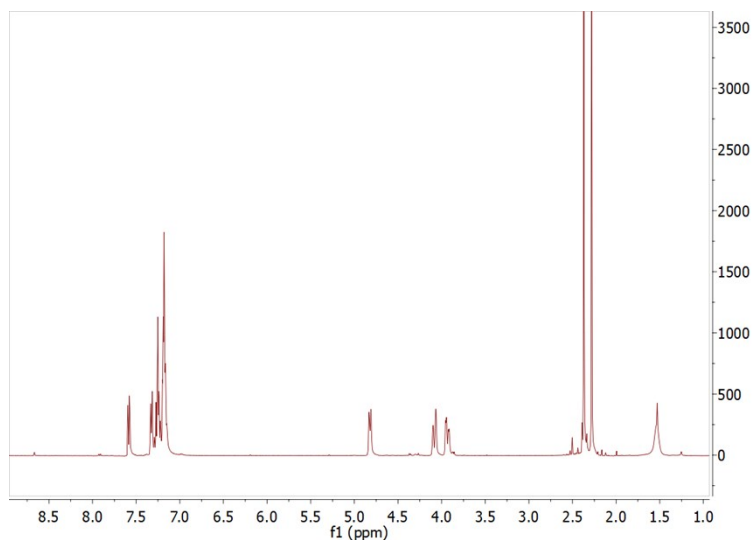

**Figure SI32.**  $^1\text{H NMR}$  spectrum in  $\text{CDCl}_3$  for the isolate cyanide **3k** of the photocatalytic oxidative cyanation of amine (**1k**, 20 mM) in the presence of the photocatalyst  $[\text{Ru}3]\text{Cl}_2$  (1 mol%) in  $\text{CH}_3\text{CN}$  under  $\text{O}_2$  and blue LED irradiation ( $\lambda_{\text{exc}} = 460$  nm) at room temperature.

## 12.- Detection of by-products in photocatalytic experiments

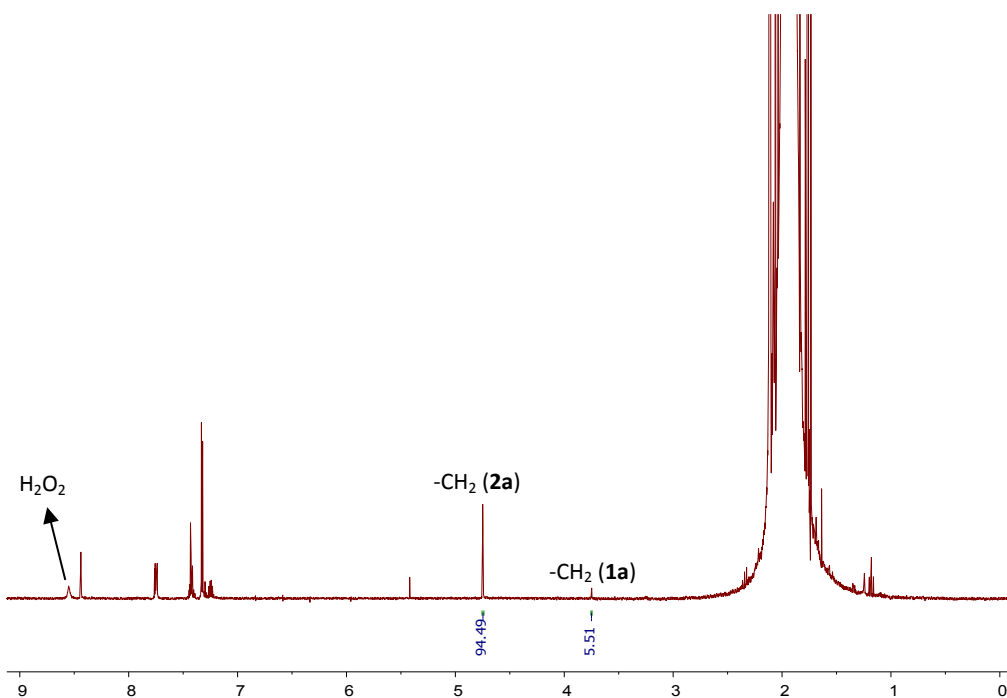

**Figure S133.** <sup>1</sup>H NMR spectra in CD<sub>3</sub>CN at 25 °C of the crude mixture obtained for the photocatalytic oxidative coupling of **1a** to produce **2a**, in the presence of [Ru3]Cl<sub>2</sub> (1 mol %), showing a broad singlet for H<sub>2</sub>O<sub>2</sub>.

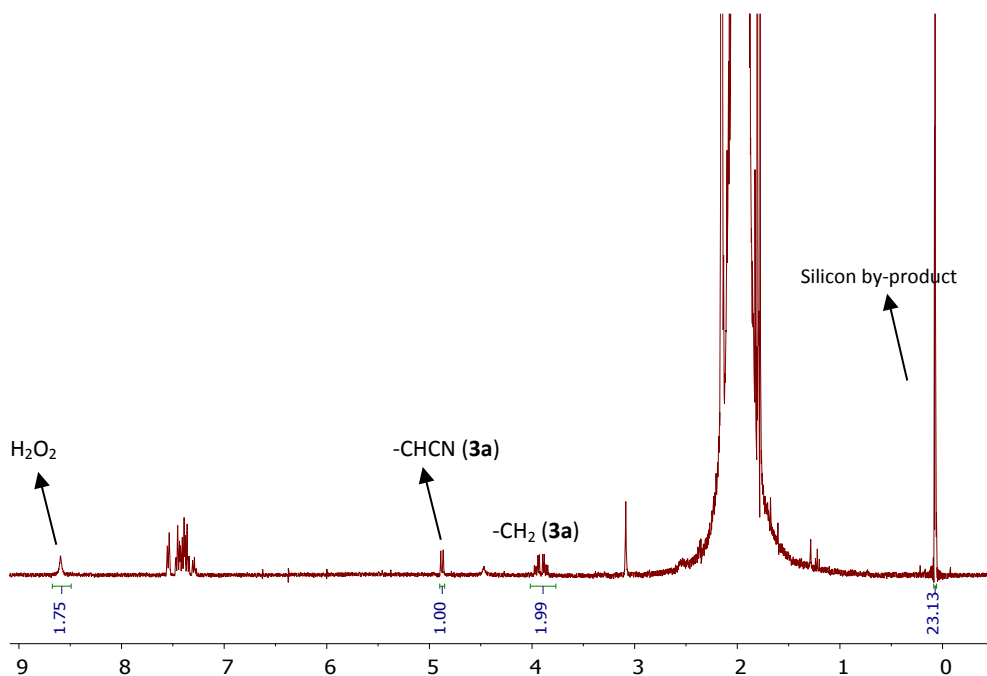

**Figure S134.** <sup>1</sup>H NMR spectrum in CD<sub>3</sub>CN at 25 °C of the crude mixture obtained for the photocatalytic oxidative cyanation of **1a** to give **3a**, in the presence of [Ru3]Cl<sub>2</sub> (1 mol %), showing signals attributed to H<sub>2</sub>O<sub>2</sub> and likely to Me<sub>3</sub>SiOH.

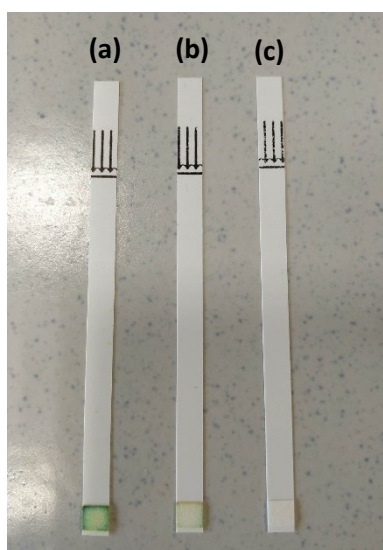

**Figure SI35.** a) Detection of  $\text{H}_2\text{O}_2$  using Quantifix® peroxide sticks (range 0-25 mg/L  $\text{H}_2\text{O}_2$ , Sigma-Aldrich) for semiquantitative determination of peroxide. The stick was introduced in the crude mixture of a photocatalytic experiment (photooxidation of benzylamine, **1a**, in the presence of  $[\text{Ru3}]\text{Cl}_2$  (1 mol %)) after 30 min of reaction and turned blue as a symptom of  $\text{H}_2\text{O}_2$  presence, b) Control experiment, c) Non used stick.

### 13. 10-fold scale-up

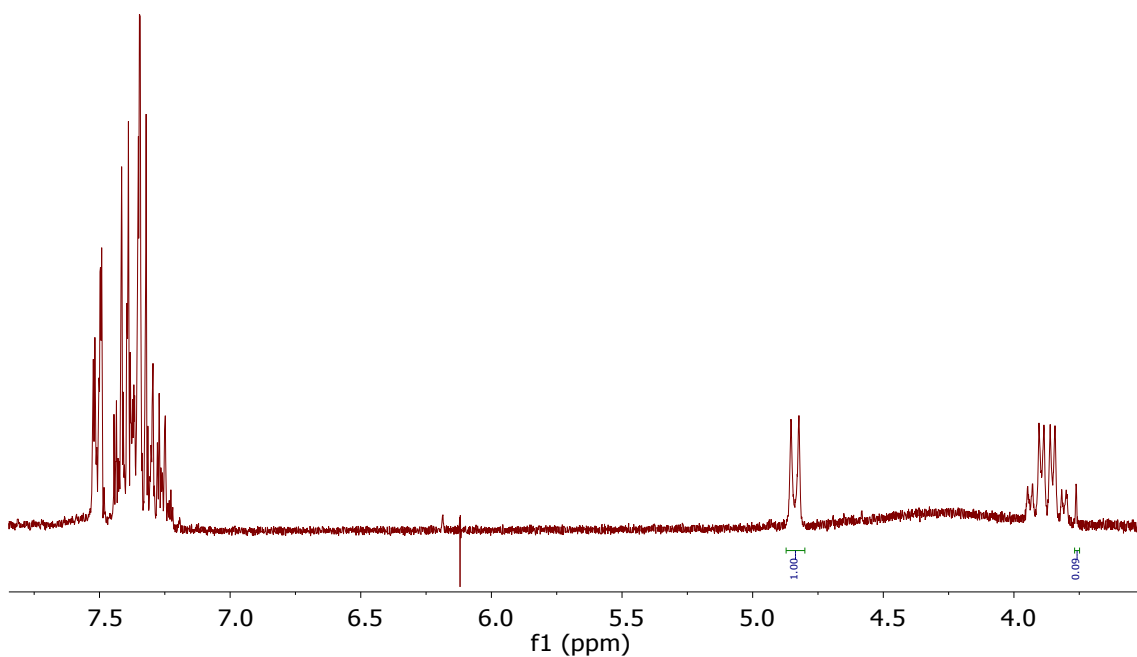

**Figure SI36.**  $^1\text{H}$  NMR spectrum in  $\text{CD}_3\text{CN}$  at 25 °C of the crude mixture obtained for the photocatalytic oxidative cyanation of **1a** (200 mg, 1.87 mmol) with TMSCN (2 equiv) in  $\text{CH}_3\text{CN}$  (25 mL) to give **3a** (96 % yield), in the presence of  $[\text{Ru3}]\text{Cl}_2$  (1 mol %), under  $\text{O}_2$  (1 atm) after 6 h of irradiation with stirring at room temperature. The singlet observed at 3.75 is attributed to the benzylamine **1a** (4 %).

14. Photooxidative coupling of **1a** to produce **2a** using  $[\text{Ru3}]\text{Cl}_2$  (0.1 mol %)

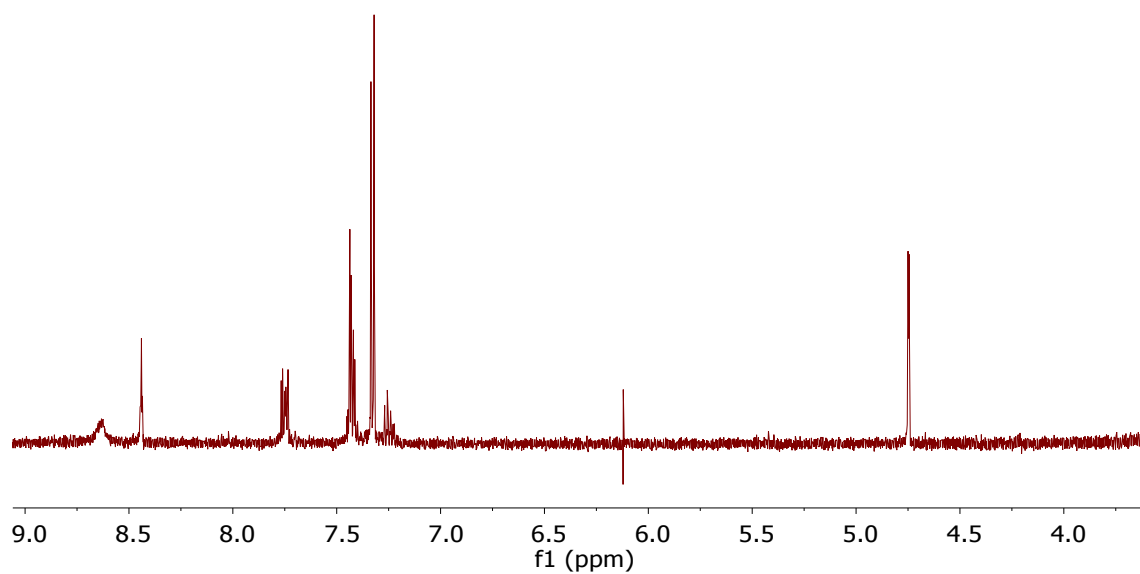

**Figure S137.**  $^1\text{H}$  NMR spectra in  $\text{CD}_3\text{CN}$  at  $25\text{ }^\circ\text{C}$  of the crude mixture obtained for the photocatalytic oxidative coupling of **1a** to produce **2a**, in the presence of  $[\text{Ru3}]\text{Cl}_2$  (0.1 mol %) under 2 h of irradiation with blue light (LED, 460 nm, 24 W).
